# Supplementary material for: Beyond autonomous regions: measuring communal self-governance
Source: Frontiers journal article supplement (doi:10.3389/fpos.2025.1553117), 2025-07-08
Supplement: Table_1.xlsx [file Table_1.xlsx]

## Sheet: Data
Country.Name	CNTRY	WB.Pol.Stability.No.Violence	FSI_2021	FSI_GG_2021	HIIK.Comm.MJ_Min.Avrg.Intensity	HIIK.Comm.MJ_Min.Idx	HIIK.Comm.MJ_Min#	HIIK.MX.intensity	Coups	Coup.Attempts	VD.Political.Polarization	VD.Political.Violence	VD.Mass.Mobilization	VD.Mass.Mobilization.Autoc	VD.Mass.Mobilization.Democr	ISD_ethnic_tensions_rating	ISD_intergroup_cohesion	peaceyears	warhist	LN.Incongruence.IdxCentralization	LN.Incongruence.Idx	LN.Incongruence.MAJ	Reg.minorities.pc	regautegippop	regautexclpop	regautpop	Territorial.autonomy	ERA_exists	Polit.Centralization	IS_Admin_Dctr	IS_Fiscal_Dctr	IS_Polit_Dctr	GDP_cap.PPP	Gross.national.income.GNI.per.capita	Empl.in.agriculture	Human.Development.Index	Life.Expectancy	Life.expectancy.at.birth	Life.Expectancy.Female	Human.capital.idxHCIscale01	Mean.years.of.schooling	Labor.f.particip.1524male	VD.Electoral.Demcrcy	WB.Gov.Effectiveness	VD.Federal.Unitary	VD.Ideology.Driven	VD.Ideol.Leader	VD.Ideol.Performance	VD.Ideol.Rational
Afghanistan	AFG	-2.63553	102.1	7.2	3	3	1	3	0	0	1.319	1.861	0.185	1.18	-0.013	9.12463	0.458588	0	2	1.12319	1.13167	1.23519	0.462	0.85	0	0.85	0.5	0	0.9925	0.05	0.175158	0	2542.29	1335.21	45.726	0.462	62.8164	62.879	66.0118	0.396887	2.51479	54.5814	0.157	-1.63572	0	2.492	-0.55	-1.251	-1.455
Albania	ALB	0.175302	59	4.1	0	0	0	0	0	0	-0.6	-0.381	-0.474	-0.176	0.849	4.5	0.482603	74	0	0.406522	1.25276	0.693147	0.1	0	0	0	0	0	0.3245	0.9	0.629687	0.333333	15672.8	15293.3	36.0922	0.789	77.7502	76.833	80.319	0.631459	10.1211	41.5484	0.53	-0.0213343	0.46	-0.583	0.704	0.236	0.763
Algeria	DZA	-0.895995	73.6	7.2	2	2	1	2	0	0	-0.838	-0.972	-0.88	1.089	0.143	3	0.472453	1	2	0.615745	0.676643	0.870828	0.28	0	0	0	0	0	0.91	0.144	0.240625	0.277778	15004.8	10978.4	9.93814	0.745	76.0998	77.129	77.4586	0.533275	6.98744	37.493	0.281	-0.559185	0.091	-0.332	-0.745	1.227	-0.132
Andorra	AND	1.54512	41.3178	3.58472	0	0	0	0	0.654728	0.587601	4.15118	-0.492343	-2.10993	-0.122368	-2.17145	5.74715	0.490202	84.8578	-2.49985	0	0.693147	0.693147	0	0.10738	-3.58304e-08	0.10738	0	0	0	0.357331	0.936653	0.58998	60881.5	54233.4	-1.65707	0.884	80.7353	83.552	82.6047	0.792038	11.6134	48.9821	0.0549993	1.74506	0.807697	3.90888	-3.53547	0.957737	1.89445
Angola	AGO	-0.534836	89	8.1	3	3	1	3	0	0	-0.619	-0.647	-0.017	0.324	1.414	3	0.473293	0	6	0.910758	0.925567	1.07264	0.62	0	0	0	0	0	0.984	0.072	0.1375	0	7858.08	5327.79	55.2029	0.591	62.085	61.929	64.6938	0.361298	5.84429	54.7664	0.343	-1.11212	0	-0.614	-0.258	2.316	0.653
Antigua &Barbuda	ATG	0.916757	54.9	3.6	0	0	0	0	0.0878545	0.0695694	0.81025	-1.87072	2.11795	-0.417639	-0.118029	6.16	0.479412	63.851	-7.08761	0.347	0.693147	0.693147	0	0.304402	0.0108866	0.315289	0	0	0.5	0.114789	0.155754	0.654647	27002.5	18784	7.2241	0.826	78.7552	79.236	81.2146	0.58696	10.5462	53.2862	-0.017467	-0.133081	0.631904	4.50778	1.59431	2.27708	1.16134
Argentina	ARG	-0.0343551	50.1	3.8	0	0	0	0	0	0	1.914	-1.319	2.013	-0.901	1.46	6	0.47483	42	3	0.260122	4.12892	0.693147	0.015	0	0	0	0	0	0.063	0.4	0.526242	0.75	26225.9	22048	7.31397	0.849	76.3258	76.064	79.6438	0.609756	11.1441	43.0934	0.808	-0.20379	0.938	-0.355	-1.847	2.107	0.824
Armenia	ARM	-0.648806	69.8	5.3	0	0	0	0	0	0	1.646	-0.122	2.467	2.114	1.083	5.38	0.477409	29	0	1.28439	3.30178	0.703815	0.014	0	0	0	0	0	0.389	0.8815	0.459764	0.333333	16931.8	15388.3	51.8138	0.786	73.6182	73.372	78.45	0.580362	11.3303	40.7546	0.729	-0.259424	0.43	-1.824	0.636	0.516	0.722
Australia	AUS	0.903738	21.8	3.1	0	0	0	0	0	0	-1.413	-1.702	0.581	-2.256	-0.536	3.5	0.484753	74	0	0.0183684	0.693147	0.693147	0	0	0	0	0	0	0.0265	0.555	0.781913	0.666667	57358.6	49257.1	2.52711	0.946	83.0698	83.579	85.18	0.775537	12.7268	67.675	0.829	1.53429	0.974	-1.414	-2.565	2.213	2.579
Austria	AUT	0.840339	26.1	3.9	0	0	0	0	0	0	-0.142	-1.042	-0.313	0.065	-0.719	4	0.48665	74	0	0.0691326	3.63856	0.693147	0.003	0	0	0	0	0	0.019	0.7	0.75842	0.75	64231.9	56529.7	3.69749	0.926	81.4127	82.412	83.82	0.757706	12.3057	58.1294	0.851	1.51002	0.982	-1.923	-1.935	1.403	1.199
Azerbaijan	AZE	-0.805358	75.1	6.1	3	3	1	3	0	0	1.132	-1.219	-1.188	-1.254	-1.237	4.5	0.482707	2	6	2.74708	2.78608	0.735707	0.046	0	0.013	0.013	0.5	0	0.986	0.75	0.41475	0.5	20042.1	15018.1	36.0835	0.76	71.1168	73.488	74.4148	0.60354	10.5561	46.5082	0.193	-0.0511913	0.008	0.836	1.946	1.386	-1.235
Bahamas	BHS	0.842707	52.4	2.9	0	0	0	0	0.275511	0.268932	1.51682	-3.04111	-1.73081	-1.37146	-2.25529	4	0.505091	47	0	0.404336	0.693147	0.693147	0	0	0	0	0	0	0.583333	0	0.0625	0.416667	29756	32534.9	3.13443	0.82	72.7288	74.358	76.0718	0.65207	12.7316	61.0788	0.312033	0.439003	0.362956	-0.587313	-3.67786	-0.552115	-0.346368
Bahrain	BHR	-0.603012	66.7	9.6	0	0	0	0	0	0	1.861	0.891	-0.482	0.937	-0.475	4	0.470651	49	0	0.686909	0.693147	0.693147	0	0	0	0	0	0	0.991	0.098	0.109375	0.333333	54279.3	48731.4	0.938866	0.888	79.4112	79.246	80.6924	0.658185	11.0466	54.7182	0.125	0.415868	0.009	1.339	2.458	1.387	-0.636
Bangladesh	BGD	-0.991799	85	8.6	3	3	1	3	0	0	1.492	2.059	-0.954	0.225	-0.284	2.5	0.465587	2	3	2.23441	2.60269	0.75015	0.01	0	0	0	0	0	0.8585	0.35	0.451562	0.25	7067.9	6511.12	38.0359	0.67	72.684	73.698	74.7344	0.461295	7.37906	53.3664	0.252	-0.742837	0.14	1.672	2.488	1.949	-1.325
Barbados	BRB	1.06487	47	2.9	0	0	0	0	0	0	-2.465	-2.638	-0.74	-1.625	-1.732	4.1184	0.495147	54	0	0.693147	0.693147	0.693147	0	0	0	0	0	0	1	0	0.0625	0	16130.4	14810.2	2.84855	0.809	77.3988	77.706	79.2462	0.577195	9.89206	45.9902	0.789	0.469695	0	0.748	1.667	1.428	0.539
Belarus	BLR	-0.347472	68	5.9	0	0	0	0	0	0	3.205	-0.2	0.551	0.176	0.152	5	0.470155	29	0	2.67918	2.96698	0.693147	0.031	0	0	0	0	0	0.903	0.418	0.224648	0.416667	26808.5	18425	10.9605	0.801	73.2684	73.246	78.5494	0.700078	12.2412	44.9846	0.174	-0.591435	0.097	0.46	1.867	-0.051	0.188
Belgium	BEL	0.522241	31	4.1	0	0	0	0	0	0	-0.612	-0.744	1.925	-1.042	-0.373	3	0.483853	74	0	0.0827576	1.23519	0.991367	0.41	0.99	0	0.99	0.5	1	0.067	0.67	0.715908	0.666667	61325.3	53644	0.934619	0.942	81.5546	82.293	83.88	0.76159	12.5286	31.5716	0.895	1.14633	0.934	-3.288	-2.778	-0.184	1.027
Belize	BLZ	0.255411	64.2	4.7	0	0	0	0	-0.2152	-0.0980662	1.81111	-0.987487	3.25503	-2.08997	3.17195	3.64909	0.475762	39	0	0.73403	1.19679	0.693147	0.433	0	0	0	0	0	0.613333	0.35	0.1875	0.386667	11402.1	9242.08	17.1261	0.7	72.384	70.962	75.9822	0.504786	8.8476	60.9372	0.864625	-0.549452	0.120265	-2.49184	-2.37332	-1.37732	0.599578
Benin	BEN	-0.351245	72.8	2.6	0	0	0	0	0	0	-0.247	0.042	0.367	-0.898	0.798	6.81401	0.482185	60	0	0.615005	1.06127	1.18562	0.485	0	0	0	0	0	0.5795	0.012	0.232187	0.25	3474.57	3406.07	29.4159	0.504	60.0914	59.954	61.5636	0.398621	3.13726	30.9708	0.397	-0.362933	0.404	-0.367	1.181	2.067	2.171
Bhutan	BTN	0.963632	68.3	9.1	0	0	0	0	0	0	-1.057	-2.457	-2.289	-1.62	-2.646	4.79183	0.479452	71	0	0.087175	0.81093	1.38629	0.6	0	0	0	0	0	0.1075	0.046	0.1625	0.583333	13742.5	10624.9	49.7711	0.681	71.6346	72.229	73.5222	0.475297	5.83579	26.0142	0.571	0.41861	0.902	0.257	0.127	1.685	0.922
Bolivia	BOL	-0.406116	74.9	5.6	0	0	0	0	0	0	2.293	-0.023	1.325	0.225	1.321	3	0.470112	52	3	0.104298	0.918924	0.693147	0.59	0	0.56	0.56	0.5	0	0.1135	0.5405	0.402847	0.708333	9507.45	7987.84	28.6305	0.698	65.7228	64.928	68.6812	0.576693	9.82775	53.424	0.606	-0.63447	0.888	1.111	-0.021	1.377	0.793
Bosnia-Herzegovina	BIH	-0.426874	72.9	6.6	1	1	1	1	0	0	1.229	-0.346	-0.435	-0.231	0.028	2.58862	0.477887	24	2	0.142847	1.152	1.09728	0.462	0.963	0	0.963	0.5	1	0.124	0.65	0.759832	0.75	17676.9	16571.4	15.3232	0.779	76.2304	75.293	78.351	0.599475	10.5363	38.1824	0.512	-0.91813	0.877	1.719	-1.114	-0.523	0.268
Botswana	BWA	1.03707	57	3.9	0	0	0	0	0	0	-1.112	-2.144	-0.939	-2.193	-1.229	4.5	0.484958	54	0	0.96411	1.87024	1.01319	0.148	0	0	0	0	0	0.5155	0.3685	0.1625	0.333333	16541.3	14841.6	17.0684	0.708	64.7174	65.913	67.0612	0.413273	10.42	39.937	0.591	0.317197	0.496	-0.98	1.749	1.824	1.412
Brazil	BRA	-0.474161	75.8	7.7	3	3	1	3	0	0	2.551	2.824	0.666	1.689	-0.487	3	0.469642	74	0	0.151955	5.06517	0.693147	0.004	0	0	0	0	0	0.03	0.7	0.775	0.833333	17595.3	14615.9	9.09507	0.76	74.1262	73.425	77.343	0.548611	8.27831	61.4188	0.675	-0.459921	0.972	1.653	1.156	1.159	0.333
Brunei	BRN	1.19276	56.3	6.5	0	0	0	0	-0.357152	-0.240777	-2.35655	-3.49242	-1.83626	-1.69239	-2.07811	5	0.488202	36	0	0.616526	1.84958	0.363668	0.14	0	0	0	0	0	0.333333	0	0.0625	0.666667	79585.8	59245.6	1.42796	0.823	74.6896	74.551	76.9294	0.626391	9.22	45.1392	0.654189	1.34094	0.716892	-2.85351	-0.178129	1.13268	1.4768
Bulgaria	BGR	0.403589	51.6	4.2	0	0	0	0	0	0	0.657	-0.787	0.442	0.031	1.163	4.5	0.483201	74	0	0.864678	1.84958	0.693147	0.1	0	0	0	0	0	0.4675	0.7	0.319665	0.75	28762.1	25920.8	6.5047	0.799	73.9117	71.528	77.62	0.642088	11.4132	26.1418	0.672	-0.0743461	0.485	-2.06	-1.167	2.074	1.594
Burkina Faso	BFA	-1.46515	87.1	4.5	4	4	1	4	0	0	0.609	1.254	1.536	1.224	1.003	3.5	0.468263	0	3	0.420047	0.693147	0.693147	0	0	0	0	0	0	0.606	0.075	0.08125	0.5	2397.38	2037	74.7111	0.438	59.7706	59.766	61.5242	0.380988	2.31869	56.5278	0.626	-0.743858	0.265	-1.185	-1.003	0.786	1.361
Burundi	BDI	-1.43695	97.1	7.3	0	0	0	0	0	0	0.926	0.01	-0.592	-0.743	-1.667	4.92067	0.467035	0	4	0.653638	0.693147	0.693147	0	0	0	0	0	0	0.943	0.05	0.1375	0.333333	872.36	712.026	85.455	0.42	61.849	61.977	63.8046	0.387873	3.30522	53.669	0.184	-1.3494	0.035	-1.531	0.296	-0.837	0.811
Cambodia	KHM	-0.0683109	80.6	6.1	0	0	0	0	0	0	0.438	-1.155	-1.645	0.084	-0.743	3.79398	0.479376	21	2	1.82871	3.13134	0.719123	0.042	0	0	0	0	0	0.584	0.279	0.2	0.333333	4684.04	4291.11	37.9143	0.6	70.2298	69.896	72.6576	0.491137	5.1971	60.7474	0.196	-0.501032	0.405	0.173	2.142	0.479	0.036
Cameroon	CMR	-1.44483	97.2	8.7	5	5	1	5	0	0	1.08	2.213	0.906	0.826	0.862	2.58	0.458147	0	5	0.868549	0.913301	0.980829	0.67	0	0	0	0	0	0.951	0.05	0.11875	0.416667	4772.77	3681.47	43.0235	0.587	60.9776	60.958	62.5972	0.395361	6.5374	50.3352	0.292	-0.888201	0.026	1.419	1.796	1.463	1.389
Canada	CAN	0.941341	21.7	2.2	0	0	0	0	0	0	-0.529	-1.202	0.488	-0.573	0.189	3.5	0.484307	74	0	0.0341644	1.39446	0.991367	0.279	0.82	0.049	0.869	0.5	1	0.0245	0.75	0.899198	0.833333	55822.6	48444.4	1.43561	0.935	81.7222	82.847	83.982	0.798805	13.8688	63.2106	0.853	1.62038	0.977	-0.799	-1.543	-0.822	1.547
Cape Verde	CPV	0.878084	64.2	2.9	0	0	0	0	0	0	-0.758	-2.564	-0.532	-2.377	-1.377	2.89893	0.482631	45	0	0.374299	0.693147	0.693147	0	0	0	0	0	0	0.54	0.083	0.0625	0.166667	7353.7	7601.09	10.772	0.661	75.0638	74.722	79.3372	0.510917	6.09004	35.5856	0.776	0.157835	0.46	-1.175	-1.074	1.402	0.492
Central African Republic	CAF	-2.16666	107	8.1	0	0	0	0	0	0	0.583	2.775	0.945	-0.618	-0.402	1.85273	0.464456	0	4	0.911938	0.91606	0.693147	0.51	0	0	0	0	0	0.9955	0.05	0.1	0	1066.12	869.112	71.2518	0.387	54.474	54.477	56.7164	0.291632	3.95316	51.5572	0.343	-1.7251	0	0.551	0.768	1.709	0.842
Chad	TCD	-1.39142	105.8	8	3	3	1	3	1	1	1.815	2.865	1.973	1.961	2.036	3.09128	0.46476	0	5	0.80041	1.06015	2.64216	0.53	0	0	0	0	0	0.755	0.05	0.1	0.38889	1846.49	1388.9	69.7394	0.394	52.8766	52.997	54.5346	0.299406	2.28275	42.079	0.167	-1.51269	0	-1.021	2.416	-2.038	-1.493
Chile	CHL	0.14408	44.1	3.2	3	3	1	3	0	0	0.747	-0.455	0.134	-0.144	0.459	5	0.473652	46	1	0.337948	1.85177	0.693147	0.128	0	0	0	0	0	0.1825	0.622	0.574525	0.5	28428.5	24431	7.68352	0.86	79.6598	79.519	82.1186	0.658435	11.1114	33.1102	0.842	0.723041	0.822	-0.94	-2.164	1.683	1.205
China	CHN	-0.397871	68.9	7.1	2.17	13.02	6	3	0	0	-0.583	-0.857	0.525	0.476	-2.577	3.5	0.474856	11	6	2.19007	2.27422	0.693147	0.083	0	0.0566	0.0566	1	1	0.963	0.71	0.574319	0.25	19243.1	18024.9	23.9618	0.788	78.1174	78.587	81.0018	0.650101	8.10691	51.7824	0.077	0.598016	0	1.841	2.033	1.093	0.485
Colombia	COL	-0.816812	79.3	7.5	3	3	1	3	0	0	0.787	2.533	3.147	0.563	3.396	5	0.46562	0	1	0.0160871	1.3406	0.861104	0.29	0	0.04	0.04	0.5	0	0.012	0.55	0.553703	0.666667	17452.6	15013.9	16.0681	0.758	74.9516	73.659	78.2204	0.601492	8.86286	54.4188	0.646	-0.0260264	0.99	0.928	-1.76	1.141	1.653
Comoros	COM	-0.256892	82.5	4.2	0	0	0	0	0	0	2.024	1.523	0.088	1.261	0.324	5.18606	0.473574	22	2	0.139474	0.853053	0.506857	0.495	0	0	0	0	0	0.1635	0.25	0.109375	0.666667	3456.37	3260.56	35.6431	0.586	63.8486	63.68	66.1964	0.402819	6.20906	15.8328	0.29	-1.72168	0.838	0.955	0.821	-0.597	-0.875
Congo DR (Zaire)	COD	-1.82525	108.4	9.4	3	6	2	3	0	0	1.324	1.155	0.882	0.777	0.782	1	0.470796	0	10	0.331113	0.849008	0.693147	0.719	0	0	0	0	0	0.39	0.05	0.11875	0.166667	1355.75	1080.14	56.8369	0.481	59.7786	59.743	61.8562	0.365449	7.20616	31.8606	0.347	-1.69485	0.368	-1.887	-0.542	-1.745	-1.223
Congo Republic	COG	-0.221431	92.4	8.4	0	0	0	0	0	0	0.249	-0.359	-0.197	1.263	0.7	4	0.45739	3	4	0.182952	0.933427	1.72804	0.54	0	0	0	0	0	0.196	0.05	0.152205	0.166667	6616.64	2902.81	32.7434	0.593	63.4314	63.053	64.8762	0.418551	8.25055	39.9968	0.247	-1.25509	0.813	-1.632	-1.134	-1.397	-1.391
Costa Rica	CRI	0.688995	42.5	3	0	0	0	0	0	0	-1.674	-2.403	0.707	-2.258	-1.663	6	0.484964	71	1	1.07317	2.07979	0.693147	0.102	0	0	0	0	0	0.516	0.0235	0.487043	0.305556	23318.3	20248.4	15.25	0.806	78.5062	77.32	81.159	0.615947	8.80406	50.9726	0.895	0.234907	0.485	-1.952	-3.008	1.365	1.479
Cote d'Ivoire	CIV	-0.839817	90.7	7.3	0	0	0	0	0	0	0.632	0.537	-0.315	0.252	0.417	2	0.471262	8	2	0.0779342	0.708493	0.693147	0.97	0	0	0	0	0	0.11	0.271	0.125	0.388889	6397.09	5376.4	45.5578	0.534	58.9428	58.916	60.2208	0.374929	4.23698	47.602	0.443	-0.525313	0.891	-0.992	-0.63	1.02	0.388
Croatia	HRV	0.663957	49.8	4.9	1	1	1	1	0	0	0.66	-1.49	0.542	-0.181	-0.892	4	0.481881	24	1	0.136647	2.65333	0.693147	0.051	0	0	0	0	0	0.0515	0.593	0.411329	0.583333	35254.2	34323.8	6.32007	0.878	77.6439	79.236	80.84	0.71953	12.3287	38.6608	0.756	0.506173	0.95	-0.128	-1.54	1.157	1.159
Cuba	CUB	0.547832	59.5	2.8	0	0	0	0	0	0	-0.317	-0.107	1.13	1.322	0.268	6	0.488297	58	3	0.523673	0.693147	0.693147	0	0	0	0	0	0	0.7555	0.15	0.284375	0.666667	15231.7	7953.45	17.5864	0.764	76.9024	78.155	79.455	0.614227	10.5481	48.7512	0.179	-0.246092	0.23	3.37	0.707	1.123	0.723
Cyprus	CYP	0.431666	57.4	5.1	2	2	1	2	0	0	0.842	-1.619	-0.864	-2.16	-1.038	2.5	0.484721	60	0	0.785957	1.46634	0.693147	0.18	0	0.18	0.18	0.5	0	0.536	0	0.21875	0.75	46921.3	40136.9	2.50721	0.907	81.4524	81.889	83.3306	0.755069	12.4402	40.3678	0.798	0.821912	0.466	0.072	-2.261	0.919	1.723
Czech Republic	CZE	0.928638	39.3	4.6	0	0	0	0	0	0	-0.259	-2.977	0.483	-0.154	0.275	4	0.486029	27	0	0.0370834	0.693147	0.693147	0	0	0	0	0	0	0.0535	0.45	0.733754	0.583333	47858.5	39944.7	2.63077	0.895	78.5371	78.129	81.6	0.758387	12.9161	32.8076	0.797	0.989351	0.948	-2.221	-0.887	0.467	1.676
Denmark	DNK	0.922593	18.8	3.7	0	0	0	0	0	0	-2.183	-2.572	-0.93	-2.017	-0.654	4	0.489304	74	0	0.0183684	0.693147	0.693147	0	0	0	0	0.5	1	0.0265	0.9	0.900445	0.583333	68213.1	62019	2.13735	0.952	81.3434	81.882	83.3	0.762963	12.9605	60.7086	0.915	1.89536	0.975	-1.965	-1.39	1.647	1.505
Djibouti	DJI	-0.39998	82.4	5.3	1	1	1	1	0	0	0.142	-0.529	-0.167	0.121	-0.204	6.14212	0.483839	20	2	0.629305	1.04797	0.793952	0.36	0	0	0	0	0	0.6005	0	0.0625	0.5	5912.9	4874.52	1.22277	0.515	62.7962	62.859	65.4258	0.365388	3.88998	16.7378	0.253	-0.836525	0.4	-0.567	-0.165	-0.012	-0.467
Dominica	DMA	1.20957	65.884	5.12092	0	0	0	0	-0.342292	-0.11852	-0.0971118	-4.62778	-2.49033	-1.57254	-1.16631	5.79792	0.48824	6.10802	1.74598	0.462098	0.693147	0.693147	0	0.0226805	0.217814	0.240495	0	0	0.666667	0	0.15625	0.333333	15098.9	12467.9	44.3952	0.74	73.3186	72.981	76.8928	0.548243	9.18634	61.8292	0.727703	-0.173371	0.164384	-2.95764	0.356088	-1.58369	-2.4606
Dominican Republic	DOM	0.157879	64.7	4.6	0	0	0	0	0	0	-0.905	-1.26	-1.723	-1.672	-1.953	5	0.482189	54	1	0.225273	0.693147	0.693147	0	0	0	0	0	0	0.325	0.0435	0.142187	0.583333	21277.7	18653.3	8.55838	0.766	73.2966	74.17	76.841	0.504824	9.15053	54.9072	0.688	-0.218223	0.467	-1.695	0.316	1.8	1.117
Ecuador	ECU	-0.220009	71.2	6.1	0	0	0	0	0	0	0.945	-0.645	0.166	-1.531	-1.342	3	0.472746	74	0	0.0607624	1.64223	0.693147	0.19	0	0.14	0.14	0.5	0	0.037	0.5	0.4375	0.666667	13582.9	10693.2	30.8108	0.765	75.6216	77.894	78.7112	0.595237	8.96975	53.3256	0.624	-0.340964	0.964	-1.061	-1.567	1.121	2.289
Egypt	EGY	-1.1111	85	8.3	3	3	1	3	0	0	0.128	-0.082	-2.009	-1.243	-2.915	5	0.467725	0	4	1.04611	1.11763	0.68148	0.09	0	0	0	0	0	0.936	0.2815	0.1	0.333333	15611	12360.8	20.233	0.728	70.819	70.159	73.2386	0.493444	9.8481	37.3564	0.183	-0.411174	0	-0.585	2.043	0.43	-0.471
El Salvador	SLV	-0.173835	71.6	5.5	0	0	0	0	0	0	1.556	0.369	1.16	0.495	0.752	6	0.477108	28	2	0.774762	2.25878	0.693147	0.1	0	0	0	0	0	0.343	0	0.385439	0.416667	10387	8886.17	15.7288	0.674	71.6796	71.475	76.1278	0.545581	7.15093	55.447	0.406	-0.388658	0.489	-1.505	0.388	-0.388	-1.493
Equatorial Guinea	GNQ	-0.147359	84.1	6.9	0	0	0	0	0	0	0.576	0.651	-1.631	0.827	-2.155	5.25824	0.473834	52	0	1.74816	1.78657	0.693231	0.115	0	0	0	0	0	0.9785	0	0.0625	0.444444	19267.6	10662.7	55.7125	0.65	61.0654	61.19	63.1024	0.466108	8.28133	27.8406	0.174	-1.18676	0	0.864	1.899	0.602	-0.312
Eritrea	ERI	-0.866809	97	8.3	1	1	1	1	0	0	1.326	-0.847	-2.547	-1.628	-1.692	5.3548	0.466546	16	2	0.977396	0.980829	1.00654	0.5	0	0	0	0	0	0.9965	0	0.0625	0	2083.58	1957.05	64.5	0.493	66.928	66.604	69.0188	0.418727	5.09136	72.957	0.072	-1.72797	0.002	1.08	0.372	-0.73	-2.234
Estonia	EST	0.678461	39.5	7.4	0	0	0	0	0	0	-0.191	-2.849	0.113	-1.888	-0.91	2.5	0.486835	29	0	0.353852	0.693147	0.693147	0	0	0	0	0	0	0.5105	0.575	0.229342	0.416667	42607.4	37151.6	2.94206	0.899	78.0746	79.155	82.5	0.775664	13.5484	44.4816	0.897	1.25554	0.491	-1.639	-3.247	1.007	2.455
Eswatini	SWZ	-0.257712	82.5	2.2	0	0	0	0	0	0	1.958	-0.742	1.946	0.23	1.66	6.63533	0.482551	52	0	0.436336	0.693147	0.693147	0	0	0	0	0	0	0.6295	0.025	0.219364	0.125	9719.09	8391.86	13.4458	0.61	58.6156	56.36	62.6094	0.371021	5.73	23.339	0.119	-0.699945	0.364	3.19	2.342	1.604	1.071
Ethiopia	ETH	-1.71075	99	9.5	5	5	1	5	0	0	2.151	2.053	2.033	1.397	1.323	2.5	0.46881	0	11	0.627031	0.998457	1.29294	0.583	0.8356	0.041	0.8766	1	1	0.628	0.45	0.360937	0.5	2539.26	2368.76	64.4845	0.492	65.4482	65.645	68.5612	0.383443	2.39085	73.171	0.293	-0.662272	0.374	0.826	0.625	0.069	0.438
Fiji	FJI	0.752669	70.4	5.7	0	0	0	0	0	0	-0.017	-1.201	-1.79	-2.413	-1.863	3.91317	0.481793	50	0	0.495947	0.693147	0.693147	0	0	0	0	0.5	1	0.7155	0.0165	0.0625	0.458333	12305.4	11233.7	29.3458	0.729	67.8106	68.312	69.6502	0.508573	10.371	49.8052	0.4	0.674628	0	0.617	0.234	0.23	1
Finland	FIN	0.912646	16.2	0.6	0	0	0	0	0	0	-1.482	-1.369	-0.491	-1.332	-1.354	6	0.493552	74	0	0.615355	2.23359	0.514046	0.06	0	0	0	0.5	1	0.2755	0.9	0.759559	0.666667	57473.7	49522.1	3.80327	0.942	81.7444	82.351	84.5	0.805243	12.9292	53.0544	0.871	1.91279	0.485	-2.344	-2.547	1.316	0.234
France	FRA	0.245213	32.5	6.4	3	3	1	3	0	0	0.664	1.29	0.802	-1.412	-0.735	2.96	0.473589	57	1	0.0691657	3.0072	0.665661	0.008	0	0.004	0.004	1	1	0.023	0.655	0.753104	0.583333	53751.5	47378.7	2.48816	0.91	82.4463	83.229	85.54	0.759349	11.6886	38.9852	0.875	1.27183	0.978	-0.54	-0.922	1.79	1.417
Gabon	GAB	-0.080847	67.4	2.6	0	0	0	0	0	0	-0.525	-0.432	0.022	1.103	1.125	4.5	0.474885	55	1	0.275617	0.870828	0.980829	0.64	0	0	0	0	0	0.3165	0	0.21875	0.5	19925.3	11194.2	30.0042	0.693	66.191	65.694	68.7246	0.457	9.55	19.6974	0.376	-0.864586	0.684	0.041	0.782	1.866	1.465
Gambia	GMB	0.0911858	80.5	2.6	0	0	0	0	0	0	-0.528	-1.21	-0.469	-1.497	-0.058	5	0.480756	38	1	0.299594	0.787368	0.693147	0.835	0	0	0	0	0	0.3805	0.2965	0.0625	0.666667	2684.44	2089.63	48.4974	0.495	62.8792	62.906	64.309	0.412432	4.51242	39.8212	0.506	-0.731388	0.463	-0.952	-1.176	1.369	1.632
Georgia	GEO	-0.449204	72.6	7.3	2	4	2	2	0	0	1.878	-0.101	1.792	-0.388	1.7	3.91089	0.477676	11	4	0.927969	1.75918	0.799303	0.156	0	0.046	0.046	1	1	0.5275	0.693	0.776378	0.416667	18465.8	15952	39.7481	0.814	72.5714	71.587	77.5196	0.588992	12.7022	46.6386	0.635	0.654078	0.41	-2.58	-1.668	1.454	1.979
Germany	DEU	0.622315	24.8	4	0	0	0	0	0	0	-0.537	-0.278	1.485	-0.695	0.477	4	0.48004	71	0	0.00623832	0.693147	0.693147	0	0	0	0	0	0	0.009	0.64	0.673144	0.75	61819.7	55340.2	1.23312	0.95	80.9445	80.989	83.4	0.757468	14.2559	54.0626	0.866	1.38275	0.992	-2.292	-2.121	0.885	0.765
Ghana	GHA	0.0502934	63.9	3.2	2	2	1	2	0	0	-0.615	0.068	2.168	-2.085	2.683	3.5	0.479496	36	2	0.5811	0.724563	0.693147	0.94	0	0	0	0	0	0.802	0.3035	0.409375	0.333333	6440.71	5380.27	40.3755	0.602	64.1432	63.945	66.2806	0.446773	6.43232	43.8992	0.661	-0.209097	0.148	-1.303	0.586	2.529	1.82
Greece	GRC	0.119399	54.5	4.2	0	0	0	0	0	0	-1.285	0.339	1.119	-1.796	1.128	5	0.477288	70	1	0.194207	2.47398	0.693147	0.023	0	0	0	0.5	0	0.0785	0.128	0.338371	0.833333	32806.8	31381.7	11.1611	0.893	81.0868	80.614	83.74	0.692406	11.4085	23.88	0.771	0.366089	0.923	-0.567	-1.224	1.602	1.878
Grenada	GRD	1.00462	56.1	3.6	0	0	0	0	0.0679267	0.10113	-0.928561	-1.78484	-0.466576	-2.46387	-1.57547	6.23356	0.480185	58.8865	0.00769986	0.693147	0.693147	0.693147	0	0.150452	0.0720136	0.222466	0	0	1	0	0.0625	0	15123.4	13593.2	8.84187	0.793	74.9732	75.335	77.939	0.553133	9.85796	51.1208	0.21339	-0.0493904	0.00488622	3.39939	2.00291	0.573167	0.414272
Guatemala	GTM	-0.446381	79.4	9.4	0	0	0	0	0	0	0.388	0.405	-0.231	-1.46	0.425	3	0.478199	24	3	0.411699	1.04228	0.693147	0.52	0	0	0	0	0	0.395	0.3	0.175	0.333333	11830.9	8996.42	30.1689	0.629	71.1126	68.674	74.2666	0.459021	5.66865	69.5634	0.554	-0.769264	0.469	-0.33	-2.532	-0.543	0.445
Guinea	GIN	-0.839355	97.4	9.3	0	0	0	0	1	1	2.437	2.71	2.197	-0.285	1.587	2	0.464627	18	1	0.544637	0.899484	1.36524	0.6	0	0	0	0	0	0.6055	0.25	0.21875	0.208333	3666.83	2404.17	60.9619	0.471	59.2546	58.985	60.3802	0.370013	2.3591	26.3864	0.258	-0.949304	0.383	2.13916	0.597	-0.19	-3.222
Guinea-Bissau	GNB	-0.528592	92	4.3	0	0	0	0	0	0	0.161	-1.837	-0.46	-1.587	-0.665	3	0.476707	20	1	0.838498	1.00902	0.693147	0.51	0	0	0	0	0	0.831	0.1335	0.0625	0	2231.35	1879.85	51.0702	0.483	60.1792	59.861	62.2952	0.279896	3.67304	39.1666	0.536	-1.49629	0	-1.374	-0.359	-0.542	-0.617
Guyana	GUY	-0.138741	66.1	6.5	0	0	0	0	0	0	1.34	-1.889	-0.68	-2.223	-1.256	1.96	0.476792	54	0	0.258549	1.25815	0.813718	0.397	0	0	0	0	0	0.2055	0.179	0.0625	0.5	21399	35782.9	13.5301	0.742	67.6336	65.989	71.1436	0.494785	8.62741	52.2708	0.531	-0.324776	0.797	-1.13	-1.163	0.883	0.927
Haiti	HTI	-1.01793	97.5	5.3	0	0	0	0	0	0	1.007	2.676	2.738	-0.462	3.143	5	0.470129	15	2	0.261663	0.693147	0.693147	0	0	0	0	0	0	0.3775	0	0.0625	0	3237.48	2801.71	46.0714	0.552	63.8492	63.728	66.836	0.445676	5.60947	38.8024	0.319	-2.11834	0.47	-1.836	-1.329	-1.58	-0.348
Honduras	HND	-0.545862	79.4	5	0	0	0	0	0	0	0.975	0.29	-0.967	-2.024	2.459	5	0.477124	74	0	0.882799	1.99955	0.693147	0.087	0	0	0	0	0	0.4415	0.3105	0.288403	0.416667	6127.94	5271.6	27.2722	0.624	71.6016	70.728	74.0732	0.480665	7.2962	69.1276	0.395	-0.713484	0.463	-1.226	-1.748	0.987	1.658
Hong Kong	HKG	0.295903	41.8805	7.92829	0	0	0	0	0	0	3.446	-1.536	-2.271	0.168	-1.715	5	0.47229	27.958	-0.867531	0.693147	0.693147	0.693147	0	0.18252	0.0393719	0.221892	0	0	1	0.65	1	0.666667	64726.9	62485.5	0.219598	0.956	84.9431	84.315	87.626	0.817237	12.3478	35.8374	0.213	1.65331	0	2.443	-2.196	-0.296	0.632
Hungary	HUN	0.754126	51.1	3.6	1	1	1	1	0	0	2.454	-2.103	-0.976	-0.239	-0.986	4	0.483923	74	0	0.54849	3.93183	0.693147	0.01	0	0	0	0	0	0.1395	0.815	0.618602	0.75	37731	34195.5	4.617	0.851	75.6268	74.958	79.12	0.694076	12.2496	35.736	0.456	0.512927	0.864	1.069	-0.256	1.01	1.394
Iceland	ISL	1.40486	18	0.5	0	0	0	0	0	0	-1.112	-2.41	-0.626	-2.074	-1.259	5.5	0.49962	74	0	0.348306	0.693147	0.693147	0	0	0	0	0	0	0.5025	0.65	0.793885	0.75	63751	54688.4	4.04532	0.959	82.8849	82.815	84.36	0.744356	13.7672	75.286	0.836	1.50856	0.498	-1.14	-1.951	0.453	1.199
India	IND	-0.779258	77	8.2	2.86	20.02	7	3	0	0	1.559	1.161	1.127	-0.559	0.835	2.5	0.460934	0	21	0.0789317	1.14394	0.90772	0.455	0.6297	0.007	0.6367	0.5	1	0.069	0.35	0.484375	0.666667	7965.04	6950.53	42.7125	0.644	69.3508	67.744	70.9262	0.489153	6.5707	43.5222	0.398	0.277964	0.932	1.644	2.017	0.752	1.227
Indonesia	IDN	-0.49749	67.6	7.1	1.75	7	4	3	0	0	0.385	0.205	1.313	-0.377	0.638	2	0.469136	1	13	0.0903183	1.30896	0.502952	0.337	0.6982	0.0492	0.7474	1	1	0.069	0.385	0.5	0.527778	12841.2	12045.6	29.2562	0.713	69.0968	68.25	71.2326	0.538998	8.55651	54.1458	0.558	0.276353	0.933	0.115	-0.576	0.604	1.697
Iran	IRN	-1.58472	84.5	9.3	2.33	6.99	3	3	0	0	1.369	-0.13	-0.208	1.198	0.373	3.5	0.467205	0	12	1.07893	1.12097	0.948285	0.39	0	0	0	0	0	0.9625	0.05	0.597302	0.208333	14771.7	14770.3	16.193	0.78	75.1122	74.556	78.0448	0.592807	10.7462	37.9552	0.159	-0.772763	0.031	2.911	1.408	-0.637	-0.145
Iraq	IRQ	-2.49266	96.2	8.2	1	1	1	1	0	0	1.837	2.374	2.713	0.671	1.738	2.5	0.462104	0	9	0.344631	1.10814	0.768048	0.356	0.16	0	0.16	1	1	0.311	0.3	0.0625	0.5	13534.9	9091.87	8.61799	0.673	70.7854	71.336	72.738	0.403563	6.81188	46.5192	0.375	-1.3004	0.689	0.443	0.046	-1.141	0.267
Ireland	IRL	0.932268	22.2	0.5	0	0	0	0	0	0	-2.383	-2.085	-1.212	-1.059	-1.589	5.5	0.488876	74	0	0.431484	0.693147	0.693147	0	0	0	0	0	0	0.6225	0.3085	0.269784	0.583333	104587	87467.5	4.43037	0.95	82.5746	82.716	84.48	0.803137	11.657	48.9134	0.899	1.41724	0.386	-1.444	-2.717	1.802	1.351
Israel	ISR	-1.00582	43	6.7	3	3	1	3	0	0	1.044	-1.195	-0.069	-1.643	1.103	2	0.465833	0	5	0.519991	1.03275	0.693147	0.43	0	0	0	0	0	0.5035	0.075	0.200953	0.666667	45251.3	43588.3	0.864317	0.915	82.6912	82.601	84.74	0.74853	13.4428	47.6582	0.739	1.19996	0.497	0.475	-2.017	-1.031	0.933
Italy	ITA	0.414079	45.2	4.3	0	0	0	0	0	0	0.57	-1.956	-0.318	-1.947	-0.408	4.5	0.479176	74	0	0.0448019	2.18546	0.693147	0.038	0	0.038	0.038	1	1	0.0205	0.345	0.490714	0.833333	49441.1	44284.2	3.89328	0.906	82.9171	84.057	85.14	0.74035	10.7401	29.489	0.857	0.399234	0.981	-1.806	-0.047	0.877	0.524
Jamaica	JAM	0.333677	61.2	2.2	0	0	0	0	0	0	-0.577	-0.488	-1.494	-1.54	-2.487	5	0.490096	58	0	0.353852	0.693147	0.693147	0	0	0	0	0	0	0.5105	0.025	0.21875	0.5	9870.85	9694.52	15.693	0.706	71.3116	70.629	73.395	0.537125	9.24819	37.931	0.806	0.539251	0.49	0.511	0.378	0.93	1.519
Japan	JPN	1.03448	32.2	2.5	0	0	0	0	0	0	-1.715	-2.072	-1.564	-0.687	-0.808	5.5	0.489138	74	0	0.0156107	1.64324	0.693147	0.01	0	0	0	0	0	0.0095	0.56	0.67925	1	44606.7	43643.9	3.21619	0.92	84.3139	84.82	87.428	0.822712	12.6692	47.6056	0.818	1.54301	0.992	-0.297	-1.447	-0.061	1.664
Jordan	JOR	-0.306841	76.8	8.6	0	0	0	0	0	0	-0.606	-0.737	-0.599	0.478	-0.294	3.5	0.474062	3	1	0.955243	1.09861	0.693147	0.5	0	0	0	0	0	0.8695	0.5	0.15625	0.125	9177.35	9294.8	3.37324	0.736	75.0946	74.215	77.5796	0.550052	10.4467	40.3194	0.253	0.13111	0.133	-0.688	1.406	0.148	0.113
Kazakhstan	KAZ	-0.213294	61.2	8	0	0	0	0	0	0	-0.513	-0.004	-0.259	-0.584	0.011	3.92	0.476921	29	0	1.40592	1.48932	0.904456	0.208	0	0	0	0	0	0.944	0.2	0.372571	0.333333	33874.9	22586.8	13.5013	0.802	72.474	69.489	76.492	0.702783	12.4334	46.111	0.255	0.0613827	0.057	-0.17	-0.254	1.624	0.183
Kenya	KEN	-1.05363	89.2	8	1	1	1	1	0	0	0.342	0.872	0.667	-1	0.998	2.5	0.466121	0	2	0.106071	0.719123	0.693147	0.95	0	0	0	0	0	0.1475	0.146	0.36449	0.333333	5238.91	4807.72	33.4794	0.601	62.3552	62.055	64.8542	0.544469	7.68636	42.3	0.509	-0.391897	0.855	-0.495	-0.849	1.453	1.194
Kiribati	KIR	1.1083	72.5291	7.77988	0	0	0	0	-0.244507	0.0782017	-1.12307	-3.01383	-1.05097	0.0343477	-0.151757	1.52775	0.473434	66.704	1.96718	0	0.693147	0.693147	0	0.296973	0.00979524	0.306769	0	0	0	0.155862	-0.0852359	0.583338	2952.78	3440.42	62.6111	0.628	67.2698	67.661	68.9466	0.481654	9.12858	24.4625	0.446618	0.056466	0.995398	1.58255	0.813963	0.604592	3.47733
Korea, North	PRK	-0.379174	90	5.2	0	0	0	0	0	0	-2.595	-2.392	1.108	2.625	-2.873	6	0.480607	72	0	0.500452	0.693147	0.693147	0	0	0	0	0	0	0.722	0.075	0.21875	0.5	34671.3	21708.6	45.2953	0.644399	73.273	73.578	75.7892	0.391024	3.68744	61.2168	0.084	-1.51579	0.28	2.897	3.577	2.173	-0.697
Korea, South	KOR	0.59692	32.5	2.3	0	0	0	0	0	0	0.527	-2.288	-0.157	-0.223	-0.448	6	0.487644	72	0	0.0190615	0.693147	0.693147	0	0	0	0	0.5	0	0.0275	0.53	0.698932	0.75	47590.1	46026.5	5.2579	0.929	83.0976	84.024	86.14	0.816661	12.6141	24.026	0.856	1.31104	0.973	-2.402	-1.979	1.796	1.944
Kosovo	XKX	-0.333871	66.2015	6.38148	0	0	0	0	0	0	0.496	-0.715	-1.6	-1.181	0.18	3.70625	0.479527	12	0	1.18242	2.18359	0.767667	0.109	0	0	0	0	0	0.5415	0.45	0.1875	0.666667	11897.1	16919.4	15.5504	0.764881	78.123	78.4243	80.5834	0.568197	9.66711	44.6673	0.666	-0.319775	0.459	-0.812	-0.688	1.18	0.857
Kuwait	KWT	0.207007	52.9	4.1	1	1	1	1	0	0	-1.085	-2.365	-1.247	-1.579	-1.234	4.5	0.481731	59	0	2.31163	2.31163	1.67669	0.11	0	0	0	0	0	1	0	0.109375	0.166667	49833.5	56729.2	2.00783	0.847	79.0528	80.264	81.757	0.563424	7.44174	32.5614	0.313	-0.0588829	0	0.025	1.07	1.558	1.549
Kyrgyzstan	KGZ	-0.453135	76.4	8.1	0	0	0	0	0	0	0.544	-0.477	-0.156	0.243	-0.189	4.17526	0.475081	29	0	1.04203	1.477	0.862733	0.263	0	0	0	0	0	0.7055	0.273	0.219157	0.277778	5976.73	4781.69	25.3515	0.701	71.7498	70.484	75.96	0.595082	11.9613	54.832	0.416	-0.724032	0.293	-0.402	-0.892	0.22	0.248
Laos	LAO	0.629426	76	7.2	2	4	2	2	0	0	0.517	-1.964	-2.576	-1.694	-2.438	6.73207	0.476745	29	2	0.567479	1.30906	0.881344	0.37	0	0	0	0	0	0.4335	0.0415	0.171875	0.527778	8051.13	7744.84	66.1783	0.62	68.2658	68.999	70.3284	0.45674	5.94697	48.2656	0.134	-0.697857	0.579	2.159	-0.943	1.818	0.199
Latvia	LVA	0.487655	44	8.3	0	0	0	0	0	0	-1.569	-2.735	-0.48	-0.838	-1.388	2.5	0.486187	29	0	0.919141	1.8129	0.693147	0.039	0	0	0	0	0	0.507	0.7	0.530696	0.5	35759.6	32083	7.0122	0.879	74.5834	75.927	79.48	0.722467	13.3333	38.365	0.834	0.88612	0.493	-0.425	-2.686	1.466	2.093
Lebanon	LBN	-1.57408	89	7.9	3	3	1	3	0	0	1.117	2.072	1.581	-0.97	0.96	5	0.466127	2	5	0.426373	0.730091	0.693147	0.93	0	0	0	0	0	0.584	0.0555	0.207813	0.5	13707.4	12313.4	3.58924	0.723	77.2464	74.416	79.2482	0.519881	8.60297	46.167	0.44	-1.09161	0.292	-1.124	-0.486	-1.865	1.015
Lesotho	LSO	-0.243645	77.9	2.7	0	0	0	0	0	0	0.053	-0.091	-2.071	0.575	-0.129	6.39879	0.484345	21	1	0.212103	0.693147	0.693147	0	0	0	0	0	0	0.306	0.025	0.378437	0	2617.88	2708.73	29.9399	0.521	53.7394	53.036	56.6062	0.399443	7.54506	48.8354	0.623	-0.928694	0.456	-1.064	-0.599	0.05	0.019
Liberia	LBR	-0.287009	89.5	4.6	0	0	0	0	0	0	-0.224	-0.483	1.95	0.019	1.268	3	0.471383	16	3	0.874546	1.47603	0.693147	0.237	0	0	0	0	0	0.5925	0.05	0.109375	0	1587.04	1330.42	39.9404	0.487	60.9504	61.1	62.2562	0.318292	5.3181	57.0726	0.63	-1.40534	0	-0.859	-1.148	-0.024	1.367
Libya	LBY	-2.39387	97	7.5	0	0	0	0	0	0	2.898	2.969	1.322	1.566	1.342	5	0.459474	0	2	0.796734	1.28713	0.756581	0.156	0	0	0	0	0	0.619	0.05	0.109375	0.666667	16057.8	19751.6	9.46347	0.746	72.3582	72.151	75.2292	0.41619	7.77861	22.1752	0.216	-1.76411	0.388	-0.77	-1.141	-0.727	-0.303
Liechtenstein	LIE	1.592	10.1635	2.64882	0	0	0	0	0.0668197	0.26256	1.6702	-1.26269	-1.75441	0.530978	-1.49504	1.97245	0.483042	94.8045	-0.336662	0	0.693147	0.693147	0	0.0493564	-8.90816e-08	0.0493563	0	0	0	0.65	1	1	179059	146673	-3.13484	0.942	83.5166	84.656	85.34	0.88881	12.3512	57.7066	0.61558	1.61087	0.842007	0.500764	-6.88657	-2.44461	-0.620685
Lithuania	LTU	0.77689	38.7	3.3	0	0	0	0	0	0	-1.056	-0.693	1.237	-0.592	-0.476	4	0.490314	29	0	0.992902	1.95453	0.782827	0.066	0	0	0	0	0	0.508	0.7	0.389005	0.75	44538.9	38131.2	6.01579	0.879	75.3541	74.293	80.22	0.716372	13.4981	38.2348	0.8	1.0135	0.492	-2.094	-2.877	0.935	1.911
Luxembourg	LUX	1.23013	21.1	2.1	0	0	0	0	0	0	-1.949	-3.076	-0.272	-1.68	-0.613	5	0.501411	74	0	0.403412	0.693147	0.693147	0	0	0	0	0	0	0.582	0.35	0.893692	0.583333	134538	78554.2	0.944972	0.927	82.5444	82.591	84.88	0.689257	12.9601	34.5192	0.88	1.73533	0.42	-3.246	-2.868	0.267	1.286
Madagascar	MDG	-0.495097	79.5	3.3	0	0	0	0	0	0	1.196	0.618	-0.543	-1.269	-1.408	2.5	0.47669	48	1	0.43391	0.693147	0.693147	0	0	0	0	0	0	0.626	0.35	0.125	0.75	1675.98	1463.55	71.5244	0.487	65.2098	65.23	67.5482	0.388742	4.59252	73.4964	0.497	-1.09471	0.353	-2.07	2.213	-0.686	1.213
Malawi	MWI	-0.219842	83.2	4.7	0	0	0	0	0	0	-0.914	-1.193	-0.19	-2.442	0.356	3.5	0.475218	56	0	0.354545	0.693147	0.693147	1	0	0	0	0	0	0.5115	0	0.125	0.666667	1726.06	1432.47	62.7715	0.508	63.3828	62.898	67.064	0.412151	5.24374	60.0804	0.605	-0.810424	0.489	-1.735	0.19	0.71	1.222
Malaysia	MYS	0.143526	56.9	5.4	1	2	2	1	0	0	1.781	-0.917	-0.044	0.223	0.02	3.5	0.478289	6	5	0.530917	1.31091	0.864997	0.346	0	0	0	0.5	1	0.405	0.535	0.41324	0.0833333	31175	27295.4	10.3205	0.807	75.6972	76.26	78.2412	0.621777	10.7483	50.9578	0.426	0.99819	0.445	1.738	1.754	2.269	1.381
Maldives	MDV	0.335218	67.6	4	0	0	0	0	0	0	1.404	-0.094	0.551	-1.467	-0.497	3.07736	0.478578	55	0	0.378805	0.693147	0.693147	0	0	0	0	0	0	0.5465	-0.000213776	-0.132187	0.648255	19104.5	18846.8	7.79172	0.762	80.1522	80.839	81.2744	0.576262	7.76239	57.1982	0.581	-0.12581	0.455	-0.353	-1.775	0.853	2.141
Mali	MLI	-2.25143	96.6	8.1	1	1	1	1	1	1	0.898	2.068	2.238	3.449	2.634	2.5	0.461629	0	7	1.21194	2.03688	0.686955	0.1	0	0	0	0	0	0.595	0	0.109375	0.444444	2438.7	2043.67	66.5818	0.41	59.2096	59.417	60.5276	0.319887	1.62671	60.3916	0.243	-1.15225	0.354	0.844	-0.2	1.047	0.101
Malta	MLT	1.01683	36.2	2.7	0	0	0	0	0	0	0.712	-2.534	-1.17	-1.967	-0.437	5	0.484845	56	0	0.392668	0.693147	0.693147	0	0	0	0	0	0	0.5665	0	0.095563	0.583333	52545.7	44464	0.941727	0.915	82.5727	83.704	84.56	0.708869	12.2103	53.5776	0.775	0.881498	0.434	-1.417	0.461	0.825	0.886
Marshall Islands	MHL	1.02947	50.7608	4.71289	0	0	0	0	0.413097	0.280978	-0.851475	-1.31154	-3.1244	-0.996804	-2.1402	6.90239	0.496272	48.8065	4.56187	0.347	0.693147	0.693147	0	0.250223	0.129024	0.379247	0	0	0.5	0.216843	0.267821	-0.0391652	6265.89	6855.23	18.451	0.731	64.9276	65.146	66.8274	0.413883	12.8184	45.7027	0.564262	0.00460149	0.198607	-2.0108	-0.844608	-1.92051	-3.71442
Mauritania	MRT	-0.591861	89.1	7.3	0	0	0	0	0	0	-0.567	-1.752	0.464	0.885	1.024	4.0979	0.478653	8	2	0.518185	0.887303	1.46634	0.7	0	0	0	0	0	0.584	0	0.125	0.333333	6164.79	5343.56	33.582	0.54	64.9168	64.691	66.7212	0.376069	4.75406	27.415	0.394	-0.749939	0.415	-1.485	-0.881	-0.934	-1.237
Mauritius	MUS	0.840493	38.1	4.4	0	0	0	0	0	0	0.719	-1.171	1.921	-0.94	1.858	2.56116	0.483304	52	0	0.369794	0.693147	0.693147	0	0	0	0	0.5	1	0.5335	0.047	0.16908	0.5	24065.4	23251.6	5.51961	0.796	74.0048	73.975	77.456	0.622565	9.99205	39.9028	0.528	0.833939	0.469	1.101	1.127	0.873	1.41
Mexico	MEX	-0.73786	69.9	6.3	3	3	1	3	0	0	1.429	1.17	-0.425	-0.228	-0.58	3	0.467739	23	1	0.0194217	1.49398	0.693147	0.199	0	0.007	0.007	0.5	0	0.013	0.275	0.422494	0.833333	21522.9	19138	13.0576	0.781	72.679	74.832	76.4398	0.612303	9.22105	55.46	0.613	-0.298541	0.989	1.278	1.626	0.455	-1.212
Micronesia	FSM	1.17616	71.7	3.7	0	0	0	0	-0.0771625	0.0237056	-0.674161	-0.231049	2.0709	-0.499976	1.63242	5.12922	0.476525	80.3876	-4.24003	0	0.693147	0.693147	0	0.108511	0.0572602	0.165772	0	0	0	0.00213937	0.331584	0.446721	3828.32	3709.15	50.4402	0.634	70.9408	70.925	74.7536	0.486192	7.33252	69.4998	0.179844	0.260252	1.08922	3.36071	3.95114	1.39393	1.36956
Moldova	MDA	-0.400666	67	6.4	2	2	1	2	0	0	-0.384	-1.407	0.347	-0.683	-0.123	2	0.48027	27	1	0.9647	1.79646	0.846537	0.172	0	0.046	0.046	1	1	0.537	0.8395	0.184549	0.5	14597.5	12963.6	57.5001	0.763	69.812	68.621	74.5136	0.582957	11.8338	39.6626	0.758	-0.44639	0.464	-2.211	-1.802	0.402	1.84
Monaco	MCO	1.34181	42.1475	2.75348	0	0	0	0	0.632966	0.706368	2.38705	-0.965225	-3.72321	-0.206776	-2.46836	-0.908768	0.501074	121.836	-4.03133	0	0.693147	0.693147	0	0.182275	0.0294264	0.211702	0	0	0	0.65	1	1	19035.3	20530	5.18781	0.861183	83.2652	86.895	83.6604	0.858819	13.0208	59.4229	0.228427	1.96671	1.077	2.41274	-0.858097	3.88883	3.41156
Mongolia	MNG	0.685061	52.3	2.6	0	0	0	0	0	0	0.113	-2.188	-0.529	-0.827	0.362	4.83	0.485982	74	0	0.363611	0.759105	0.693147	0.04	0	0.04	0.04	0.5	0	0.479	0.2	0.362832	0.416667	15355.2	10350.9	26.5728	0.741	71.7608	72.667	76.513	0.615853	9.4237	37.269	0.611	-0.368525	0.532	-1.361	-2.979	0.275	1.464
Montenegro	MNE	-0.0154592	58.5	9.1	0	0	0	0	0	0	1.578	-0.293	0.535	0.815	0.716	2.13231	0.47441	14	0	0.676494	1.14757	1.17007	0.465	0	0	0	0	0	0.5895	0.7	0.15625	0.75	24449.9	22513.3	7.44909	0.844	75.8937	76.845	78.68	0.628002	12.6162	37.2854	0.509	0.0067591	0.411	-0.18	-1.517	0.308	1.01
Morocco	MAR	-0.355281	71.5	8.5	3	3	1	3	0	0	-0.695	-0.701	0.033	0.688	-0.348	4.5	0.47577	30	2	0.916439	1.32914	1.14411	0.408	0	0	0	0	0	0.6895	0.385	0.260932	0.5	8508.1	7954.52	31.9462	0.698	74.2382	74.973	76.4834	0.498329	6.05	40.6108	0.263	-0.218913	0.311	0.194	1.032	0.638	0.428
Mozambique	MOZ	-1.0858	93.9	5.8	4	4	1	4	0	0	-0.624	1.342	-1.308	-1.995	-1.995	4	0.468	0	3	0.360573	0.958971	0.693147	0.452	0	0	0	0	0	0.376	0	0.40625	0.166667	1475.38	1219.24	70.6699	0.461	60.3628	59.625	63.2868	0.358792	3.86009	59.8148	0.365	-0.817487	0.624	-0.299	-0.196	0.198	0.242
Myanmar	MMR	-1.68096	93.8	9.9	3.13	25.04	8	4	1	1	2.576	1.625	3.548	0.142	3.653	2.5	0.465856	0	24	0.705115	1.48445	0.863965	0.273	0	0	0	0.5	1	0.475	0	0.0859375	0	5799.56	4037.71	47.3695	0.608	66.56	67.256	69.7826	0.474742	6.51816	52.1874	0.108	-1.27738	0.424	0.238	-0.766	-0.658	0.438
Namibia	NAM	0.560225	64.3	4.6	0	0	0	0	0	0	0.003	-2.379	-0.525	-1.93	-1.66	4.5	0.480816	30	0	0.199212	1.14161	0.732968	0.433	0	0	0	0	0	0.1745	0.275	0.109375	0.583333	11258.9	9200.03	22.0769	0.61	61.1636	58.059	64.8216	0.445758	7.24346	31.2058	0.637	0.0634208	0.834	-0.032	-0.03	1.263	1.62
Nauru	NRU	0.836216	59.2559	2.37889	0	0	0	0	0.281169	-0.0331405	-1.50378	-2.82885	-1.26454	-3.99644	-2.70123	6.66629	0.498697	100.649	-2.69288	0.693	0.693147	0.693147	0	0.263402	0.107393	0.370795	0	0	1	0.0513614	0.324722	-0.107174	10834.6	14938.6	44.6661	0.696	63.5572	64.014	67.3452	0.508412	9.24798	67.4882	0.295113	0.142545	0.0565558	3.11258	2.67197	2.32962	-2.09635
Nepal	NPL	-0.323261	82.2	9.4	2	4	2	3	0	0	1.093	-0.123	0.282	-1.461	0.347	0.311018	0.465528	13	2	0.110487	1.71298	1.44121	0.22	0	0	0	0	0	0.0645	0.025	0.21875	0.75	4459.35	4025.55	62.1471	0.601	69.3434	70.484	71.1938	0.501397	4.4856	38.1538	0.609	-0.976335	0.939	-0.014	-0.845	0.19	1.495
Netherlands	NLD	0.820082	24.1	3.6	0	0	0	0	0	0	-0.752	-0.611	1.269	-1.151	-0.04	4.5	0.482965	74	0	0.0616901	0.693147	0.693147	0	0	0	0	0.5	1	0.089	0.7	0.36384	0.5	66992.1	57278.3	2.08335	0.946	81.6615	82.451	83.28	0.796477	12.5816	68.2614	0.864	1.73784	0.913	-2.032	-2.474	1.617	1.974
New Zealand	NZL	1.42066	18.4	2.6	0	0	0	0	0	0	-1.561	-1.52	-0.289	-1.622	-0.989	3.5	0.488237	74	0	0.356278	0.693147	0.693147	0	0	0	0	0	0	0.514	0.55	0.789343	0.666667	47730.4	43665.5	5.96467	0.939	82.1976	83.006	83.98	0.773573	12.9447	64.9424	0.883	1.48957	0.486	-0.527	1.14	0.696	0.047
Nicaragua	NIC	-0.669913	77.1	5.9	3	3	1	3	0	0	3.161	1.286	-1.255	0.838	-0.669	5	0.475902	29	2	0.557861	0.838258	0.771399	0.127	0	0	0	0.5	1	0.6655	0.05	0.15625	0.75	6710.24	5426.51	28.3984	0.669	73.6302	74.615	76.6106	0.50774	7.26	71.8748	0.198	-0.837856	0.335	1.778	1.51	2.637	1.27
Niger	NER	-1.48821	96	7.5	0	0	0	0	0	1	-0.409	0.347	0.161	0.311	0.187	3	0.466083	0	6	0.36853	1.34993	0.638087	0.35	0	0	0	0	0	0.273	0.025	0.4375	0.388889	1579.56	1283.31	71.3918	0.394	62.0916	62.08	63.1766	0.316857	1.34135	70.7686	0.52	-0.722464	0.728	-1.236	0.277	1.307	1.493
Nigeria	NGA	-1.90158	98	8.8	2.5	5	2	3	0	0	-0.788	1.332	1.292	0.922	0.794	2	0.45805	0	5	0.0196992	0.804048	0.693147	0.81	0.68	0.125	0.805	0.5	1	0.0245	0.2	0.242812	0.666667	5693.09	4754.84	38.5045	0.548	52.932	53.633	53.2592	0.357681	7.58597	26.2976	0.476	-1.10775	0.977	-0.578	1.203	1.239	1.237
North Macedonia	MKD	0.0176282	64.5	6	3	3	1	3	0	0	1.154	-2.061	0.014	-1.056	0.352	5.17797	0.480186	18	1	0.573823	1.13628	0.90169	0.286	0	0	0	0	0	0.505	0.0135	0.1875	0.75	21900.8	16395.8	12.1012	0.765	75.0635	73.888	77.268	0.546371	10.2282	37.2188	0.585	-0.0483849	0.496	-0.632	-1.294	1.902	1.264
Norway	NOR	1.08671	16.6	3.3	0	0	0	0	0	0	-2.814	-1.726	-1.321	-1.978	-2.091	4.5	0.488457	74	0	0.0353505	0.693147	0.693147	0	0	0	0	0	0	0.051	0.9	0.736081	0.583333	88419.7	69189.8	2.16117	0.966	82.9302	83.393	84.6	0.769793	13.0623	57.5518	0.886	1.86025	0.951	-0.895	-2.374	1.394	1.18
Oman	OMN	0.522547	50.4	2.3	0	0	0	0	0	0	-2.949	-2.879	-2.883	-0.876	-1.542	5	0.488978	44	2	0.411036	0.693147	0.693147	0	0	0	0	0	0	0.593	0.05	0.0625	0	38768	32967.4	5.31434	0.819	75.4402	73.935	77.479	0.609652	11.8927	56.3752	0.173	0.0609991	0.418	0.65	2.259	0.52	1.485
Pakistan	PAK	-1.98242	90.5	8.8	3	12	4	3	0	0	0.202	0.853	1.378	-0.907	1.298	1	0.462758	0	8	0.452248	1.17315	0.749561	0.336	0	0	0	0.5	1	0.3855	0.35	0.5	0.555556	5495.5	5374.27	37.4535	0.54	66.4072	66.431	68.8842	0.402687	4.42232	61.817	0.402	-0.603534	0.615	0.168	1.604	1.55	1.49
Palau	PLW	1.16032	52.9567	2.71384	0	0	0	0	0.338418	0.570264	1.38295	-1.18135	-0.0480458	1.08249	-0.0878575	4.38152	0.49394	54.3083	-2.18916	0	0.693147	0.693147	0	0.246639	-1.6718e-08	0.246639	0	0	0	0.658228	0.928164	0.638482	17963.9	19343.8	45.7609	0.797	67.5758	65.362	72.4081	0.577712	13.0479	33.9451	0.640393	0.333588	0.940393	1.13277	-2.55825	0.59404	1.21357
Panama	PAN	0.276666	48.7	5.6	0	0	0	0	0	0	-0.883	-1.577	-1.694	-2.141	-1.615	5	0.484592	30	1	0.453903	1.30808	0.693147	0.285	0	0.125	0.125	1	1	0.347	0.025	0.203125	0.333333	31556.7	32029.4	14.7272	0.82	77.0758	76.826	80.3394	0.507773	10.687	56.4788	0.744	0.0548376	0.485	-2.217	-2.446	0.968	-0.672
Papua New Guinea	PNG	-0.640166	80.9	5.1	1	1	1	1	0	0	-1.61754	-0.214244	0.26469	-2.80792	-0.396423	2	0.476056	23	1	0.0976148	0.848825	0.687201	0.034	0	0.034	0.034	1	1	0.115	0.05	0.1375	0.5	4158.87	3710.33	19.2572	0.568	65.5504	65.958	68.637	0.426979	4.93363	33.6948	0.455	-0.793929	0.887	-1.772	-1.581	-1.194	-0.051
Paraguay	PRY	-0.0106395	66.4	4.6	0	0	0	0	0	0	-0.648	-0.336	0.638	-1.27	1.124	5	0.47647	30	3	0.123484	3.6861	0.693147	0.02	0	0	0	0	0	0.0335	0.55	0.385416	0.666667	15274.6	13161.1	19.4402	0.731	72.2216	70.475	75.179	0.527843	8.86184	68.8126	0.583	-0.603069	0.968	-1.024	-1.542	0.499	0.194
Peru	PER	-0.319995	71.4	8.6	0	0	0	0	0	0	1.944	-0.355	2.141	0.123	0.521	3	0.470222	9	3	0.059114	1.4596	0.824224	0.291	0	0.255	0.255	0.5	0	0.0405	0.65	0.370594	0.75	14853.8	11916.4	27.7813	0.762	74.3184	73.385	76.7694	0.599904	10.017	63.1912	0.769	-0.287156	0.96	-1.408	-1.493	0.487	1.109
Philippines	PHL	-0.899984	82.4	7.3	2.33	6.99	3	3	0	0	-0.636	0.171	0.486	-1.958	0.499	4	0.469887	0	5	0.0405229	1.88479	0.738256	0.126	0	0.051	0.051	1	1	0.0215	0.635	0.5	0.75	9030	9058.84	23.9922	0.71	71.4252	72.187	73.3902	0.532489	8.97141	40.3404	0.43	0.0581713	0.98	-0.803	1.029	-0.112	0.777
Poland	POL	0.502924	43.1	5.6	0	0	0	0	0	0	3.354	-0.507	2.223	-0.801	2.508	6	0.479882	74	0	0.232006	2.66673	0.693147	0.014	0	0	0	0	0	0.087	0.7	0.623046	0.583333	39423.2	35151	9.00335	0.881	76.9629	76.996	81.04	0.756655	13.1648	37.154	0.587	0.379727	0.913	1.108	-0.832	1.504	0.467
Portugal	PRT	0.99467	26.8	1.3	0	0	0	0	0	0	-0.966	-2.23	-0.567	-0.409	-0.461	6	0.492024	74	0	0.359397	0.693147	0.693147	0	0	0	0	0.5	0	0.5185	0.59	0.555628	0.75	39294.9	35315	5.42052	0.874	81.3868	82.24	84.46	0.776195	9.57594	34.0212	0.89	1.05014	0.483	-2.528	-2.721	1.237	1.022
Qatar	QAT	0.758985	44.1	3.4	0	0	0	0	0	0	-1.887	-1.987	-1.955	-1.15	-1.591	6	0.492136	49	0	0.693147	0.693147	0.693147	0	0	0	0	0	0	1	0	0.11875	0.333333	107979	95944.4	1.37435	0.875	80.3636	81.559	81.965	0.636299	10.1317	73.8758	0.089	0.883672	0	1.451	2.467	1.504	-1.574
Romania	ROM	0.431397	51	6	0	0	0	0	0	0	0.962	-0.764	-0.328	-0.412	-1.126	3.5	0.477529	30	1	0.443476	2.34643	0.787368	0.063	0	0	0	0	0	0.189	0.45	0.427105	0.583333	37074.4	31641.4	20.1068	0.827	74.6668	74.117	78.58	0.589299	11.3602	34.1236	0.77	-0.168421	0.814	-1.339	-2.21	0.551	1.367
Russia	RUS	-0.676756	73.6	8	3	3	1	3	0	0	1.196	0.09	1.169	0.716	0.431	3	0.468157	0	7	0.6669	1.87332	0.8061	0.131	0	0.1293	0.1293	1	1	0.356	0.25	0.34355	0.708333	37711.2	26991.8	5.84568	0.821	71.9061	70.116	76.94	0.705185	12.4115	35.2062	0.244	-0.219222	0.654	1.177	2.205	0.542	1.477
Rwanda	RWA	0.0660848	85	9.6	0	0	0	0	0	0	0.785	-0.746	-2.003	-0.005	0	5.04198	0.466925	0	3	0.356278	0.693147	0.693147	0	0	0	0	0	0	0.514	0.0385	0.08125	0.527778	2642.25	2316.81	51.9498	0.548	66.5326	67.129	68.63	0.378232	4.87831	44.7632	0.227	0.181377	0.422	1.338	1.535	1.673	0.573
Samoa	WSM	1.12557	64.2	4.5	0	0	0	0	-0.187548	-0.28706	1.50699	-2.45972	0.371375	-3.21831	-2.74508	4.0754	0.493807	43.9867	0.864256	0.693147	0.693147	0.693147	0	0.247378	0.14553	0.392908	0	0	1	0	0.0625	0	6418.39	4970.23	20.8026	0.702	72.5852	72.598	75.2828	0.535408	11.3674	51.9232	0.80258	0.456291	-0.290538	-2.32358	-1.39835	-1.86335	3.12425
San Marino	SMR	1.23428	46.086	9.11023	0	0	0	0	-0.0782849	-0.0948505	0.500049	-1.31183	-3.14033	-2.85707	0.0444161	9.37816	0.482913	-11.2124	4.27764	0	0.693147	0.693147	0	0.287179	0.0544151	0.341595	0	0	0	0.0546555	0.034147	0.62582	63187.5	57686.5	-39.0811	0.867	82.9544	83.433	84.6336	0.672051	10.5207	43.8568	0.746578	1.69052	0.902559	-0.321059	-3.22411	-0.998148	-2.88508
Sao Tome & Principe	STP	0.539762	71.5	4.2	0	0	0	0	0	0	-2.646	-1.081	-1.223	-1.604	-1.116	2.90408	0.480489	67.8434	-1.58756	0.030845	0.693147	0.693147	0	0.274538	0.0554208	0.329959	0	0	0.0445	0	0.0625	0.5	5665.58	4054.11	17.6684	0.613	68.2096	68.794	71.26	0.444066	5.91579	46.7424	0.69	-0.771585	0.956	-1.199	-0.173	0.565	0.137
Saudi Arabia	SAU	-0.577785	69.7	9	3	3	1	3	0	0	-1.345	-1.544	-3.02	-2.117	-2.4	5	0.472273	40	1	1.01847	1.02565	0.91458	0.43	0	0	0	0	0	0.993	0.05	0.0625	0.0833333	47798	50620.4	3.0484	0.875	77.1192	77.905	78.8216	0.578572	11.3105	32.9588	0.015	0.339621	0.005	1.518	2.375	1.614	-0.902
Senegal	SEN	-0.109233	73.4	5.2	3	3	1	3	0	0	0.226	-0.792	0.968	1.228	0.825	3	0.476701	8	2	0.369989	0.719123	0.693147	0.95	0	0	0	0	0	0.5145	0.541	0.240625	0.416667	4183.62	3463.81	22.3969	0.517	67.927	67.913	70.1934	0.420587	2.88737	39.7078	0.726	-0.100894	0.488	-0.014	0.122	1.349	0.957
Serbia	SRB	-0.100364	67.4	7.1	0	0	0	0	0	0	1.065	0.783	1.832	0.385	1.269	3	0.477219	14	0	1.26664	2.35873	0.693147	0.071	0	0.035	0.035	0.5	0	0.537	0.475	0.686434	0.75	21543.8	19494	14.7476	0.805	74.9135	74.137	77.664	0.718046	11.5048	37.6076	0.34	0.0187074	0.464	1.344	1.912	1.334	0.674
Seychelles	SYC	0.707062	56.3	4.1	0	0	0	0	0	0	0.336	-1.566	-1.512	-1.966	-1.936	8.28878	0.48604	42.5557	0.596508	0.688295	0.693147	0.693147	0	0.46759	0.124794	0.592385	0	0	0.993	0	0.0625	0.166667	31152.9	28385.7	9.99528	0.802	74.2741	71.738	77.88	0.631668	11.1999	37.465	0.712	0.699363	0	-0.69	-0.409	2.24	1.461
Sierra Leone	SLE	-0.126955	83.4	5.6	0	0	0	0	0	0	-0.743	0.191	-0.866	0.512	-1.351	3.5	0.47648	18	1	0.464152	0.870828	0.693147	0.72	0	0	0	0	0	0.533	0	0.0625	0.25	1629.58	1612.67	44.6146	0.458	60.0574	60.411	61.377	0.357994	3.51943	29.8748	0.547	-1.14787	0.467	-1.253	-0.268	0.859	1.9
Singapore	SGP	1.4578	26.6	2.2	0	0	0	0	0	0	-1.057	-2.96	-2.931	-1.998	-2.311	6	0.496696	55	0	0.693147	0.693147	0.693147	0	0	0	0	0	0	1	0.65	1	0.666667	123711	88761.1	0.127484	0.949	83.2849	84.133	85.6	0.883105	11.9249	38.6042	0.402	2.22858	0	0.353	0.144	2.149	1.382
Slovakia	SVK	0.61979	39	5.7	0	0	0	0	0	0	-0.12	-2.324	0.253	-0.296	-0.54	3.5	0.487224	27	0	0.0187381	1.97243	0.693147	0.101	0	0	0	0	0	0.0095	0.459	0.562509	0.75	37211.5	32171.2	2.68498	0.855	76.6956	75.33	80.24	0.672519	13.0072	35.2	0.851	0.500826	0.992	-1.527	-2.13	1.039	1.25
Slovenia	SVN	0.771813	28.2	3.6	0	0	0	0	0	0	3.184	-0.575	2.912	-1.005	3.007	3.5	0.483934	28	0	2.23761	4.34065	0.693147	0.001	0	0	0	0	0	0.5155	0.7	0.386972	0.75	45298.5	41586.9	4.4443	0.926	81.0795	82.133	84.04	0.781838	12.8802	37.9302	0.716	1.09068	0.485	-0.059	-0.315	1.358	0.704
Solomon Islands	SLB	0.466749	79.3	5.3	0	0	0	0	0	0	-1.072	-0.833	0.731	-1.616	-0.346	2.1732	0.48636	42	0	0.37326	0.693147	0.693147	0	0	0	0	0	0	0.5385	0.0182039	-0.0174261	0.254124	2780.66	2273.31	38.0299	0.562	70.3688	70.742	71.9512	0.425366	5.87968	69.3304	0.614	-0.796512	0.462	-1.912	-2.053	-0.71	0.52
Somalia	SOM	-2.48545	110.9	8.3	1	1	1	1	0	0	0.867	1.544	0.062	0.072	0.211	2	0.455035	0	5	0.623486	0.693147	0.693147	0	0	0	0	0	0	0.8995	0	0.0625	0.166667	1495.49	1072.2	26.7726	0.38	56.1614	56.107	58.267	0.275834	1.9003	19.9084	0.167	-2.14687	0	-0.69	0.014	-0.914	-0.895
South Africa	ZAF	-0.449372	70	5.9	0	0	0	0	0	0	0.411	0.757	0.114	-0.542	-0.774	3	0.46932	31	2	0.0590142	0.711014	0.693147	0.965	0	0	0	0	0	0.083	0.4	0.581658	0.416667	14351.1	13185.6	18.797	0.717	64.1844	61.48	66.9982	0.424001	11.607	31.019	0.724	0.0161048	0.917	-0.052	-1.046	0.701	-0.077
South Sudan	SSD	-2.32837	109.4	8.8	0	0	0	0	0	0	1.869	2.751	-1.325	-0.023	-0.673	5.67776	0.464964	0	1	0.846786	0.931558	1.09861	0.52	0	0	0	0	0	0.909	0.197556	0.070887	-0.0264839	-9671.61	690.661	60.855	0.381	55.5768	55.567	57.0314	0.306217	5.72614	56.7648	0.131	-2.36137	0	-1.422	-0.883	-0.475	-0.903
Spain	ESP	0.350867	44.8	6.7	1	2	2	1	0	0	0.16	-2.398	-0.717	-1.035	-1.751	4	0.478281	28	3	0.00763264	1.01769	0.83603	0.283	0	0.283	0.283	1	1	0.0075	0.37	0.742786	0.5	44544.1	40043.3	4.01585	0.911	83.1815	83.912	86.06	0.732206	10.6054	33.998	0.851	0.924494	0.994	-1.96	-1.684	-0.639	1.012
Sri Lanka	LKA	-0.321298	80.5	8.6	2.5	5	2	3	0	0	0.413	-0.603	0.631	-0.803	0.943	3	0.46863	10	3	0.201994	1.64223	0.800506	0.24	0	0	0	0	0	0.123	0.5865	0.21875	0.472222	14169.9	11899.5	26.2546	0.78	76.2316	76.61	79.8158	0.595847	11.2496	39.1828	0.577	-0.193208	0.886	0.932	-0.33	0.781	-0.127
St Kitts &Nevis	KNA	0.840184	34.6669	3.70433	0	0	0	0	0.105447	0.229865	1.99382	0.723473	1.80638	0.947095	1.7579	5.65868	0.485114	1.1885	4.95742	0.347	0.693147	0.693147	0	0.267349	0.0733207	0.340669	0	0	0.5	0.147545	0.645069	0.0822671	28593.9	28441.7	14.7188	0.838	71.675	72.027	75.3106	0.579328	10.8494	64.7117	0.778997	0.475116	0.414952	-0.0980158	-2.22537	-1.30377	-1.40172
St Vincent &Grenadines	VCT	0.975479	47.1306	4.56183	0	0	0	0	0.690228	0.447977	1.68945	-0.0876186	-1.79103	-0.821541	-2.39296	3.9398	0.486972	65.651	3.17411	0.577623	0.693147	0.693147	0	0.10837	0.118516	0.226886	0	0	0.833333	0	0.0625	0.166667	16004.6	14049.1	10.0948	0.772	71.538	68.972	74.3028	0.534603	10.9963	66.3778	0.46187	0.320048	-0.0356798	-0.0588875	-0.228126	0.00478376	-2.58867
St. Lucia	LCA	0.893106	53.5962	5.81174	0	0	0	0	0.0324896	-0.157464	-0.743002	-0.815999	2.17359	-1.76396	-0.50428	4.30714	0.478064	51.066	4.67647	0.288811	0.693147	0.693147	0	0.10319	0.0340239	0.137214	0	0	0.416667	0	0.0625	0.583333	20366.2	14778.3	10.0071	0.725	72.5246	71.294	76.137	0.595576	8.57697	58.9888	0.717602	0.152191	0.567077	0.152559	1.92283	-0.445494	-0.701572
Sudan	SDN	-1.8323	105.2	9.5	3.25	13	4	5	1	2	0.378	0.716	3.172	-0.247	2.529	2	0.461014	1	5	0.710661	0.845019	1.28967	0.753	0	0	0	0.5	0	0.841	0.375	0.21875	0.388889	3628.08	3514.77	40.8996	0.516	65.6032	65.578	68.1784	0.376743	3.87	34.683	0.155	-1.63926	0.078	-1.086	-0.892	-1.233	-1.46
Suriname	SUR	0.261835	61.5	6.4	0	0	0	0	0	0	-0.281	-0.777	-0.142	-1.363	-0.573	4	0.475362	32	1	0.386828	0.715685	0.693147	0.956	0	0	0	0	0	0.5405	0	0.0625	0.333333	20444.9	12310	7.66891	0.69	71.5838	70.289	74.9452	0.526737	8.38863	43.9602	0.75	-0.703274	0.471	-0.935	1.055	1.662	0.79
Sweden	SWE	0.969456	21.4	1.7	0	0	0	0	0	0	-1.486	-1.962	-0.929	-2.534	-0.981	5	0.48569	74	0	0.0360437	0.693147	0.693147	0	0	0	0	0	0	0.052	0.9	0.771875	0.541667	62231.9	56995.8	1.79643	0.952	82.838	83.505	84.6	0.798934	12.6737	53.89	0.901	1.64021	0.948	-1.899	-2.705	1.04	0.837
Switzerland	CHE	1.21652	19.9	2.7	0	0	0	0	0	0	-1.543	-2.345	0.783	-1.414	-0.409	4	0.495357	74	0	0.00412331	0.916291	0.877197	0.308	0.938	0	0.938	0.5	1	0.0045	0.9	0.957863	1	80587.9	69432.8	2.54604	0.967	83.5727	84.255	85.56	0.761111	13.9041	66.7174	0.897	1.98576	0.997	-2.905	-2.206	-0.51	1.474
Syria	SYR	-2.72702	110.7	9.7	3	3	1	3	0	0	3.025	3.235	1.019	0.674	0.213	2.5	0.454075	0	6	0.733215	0.771399	1.45785	0.86	0	0.08	0.08	0.5	0	0.9505	0.115	0.15625	0.25	3016.8	3594.11	15.9719	0.557	71.694	72.3	75.5306	0.494986	5.7368	39.1628	0.138	-1.74382	0.052	1.557	1.682	-1.47	-0.81
Taiwan	TWN	0.780294	25.6757	1.99272	0	0	0	0	0	0	-1.047	-1.889	1.28	-0.91	1.609	5	0.486023	71	0	1.76283	3.38681	0.7033	0.02	0	0	0	0	0	0.5205	0	0.5625	0.666667	72000	59651.1	-6.11633	0.925	81.16	81.3372	84.34	0.759872	11.9165	39.8775	0.819	1.2043	0.48	-1.201	-1.056	1.295	1.174
Tajikistan	TJK	-0.626311	75.1	6.7	3	3	1	3	0	0	-1.186	-0.641	-0.739	0.983	-0.951	-0.335769	0.482729	8	2	1.99499	2.02537	0.796618	0.152	0	0	0	0.5	1	0.985	0.2	0.219754	0.25	3892.79	4807.21	44.6892	0.679	70.4192	71.288	72.6062	0.523121	11.2896	29.5004	0.176	-0.888665	0.015	1.461	2.749	1.529	0.437
Tanzania	TZA	-0.410246	79.3	4.9	0	0	0	0	0	0	-0.846	-1.209	-1.24	-0.609	0.09	4	0.476649	59	0	0.634735	1.25815	0.936636	0.397	0	0.018	0.018	0.5	1	0.5045	0.3175	0.207813	0.5	3432.67	2578.16	65.8702	0.532	66.583	66.782	68.7098	0.388048	5.63997	70.0932	0.373	-0.689069	0.471	0.526	-0.127	1.469	0.743
Thailand	THA	-0.564191	70.9	7.3	3	3	1	3	0	0	2.249	0.718	2.846	0.489	2.387	4	0.465013	0	3	1.44349	1.79093	0.786238	0.065	0	0	0	0	0	0.806	0.35	0.463289	0.583333	20665.9	16886.5	31.4798	0.803	79.0612	79.68	83.4498	0.613086	8.83456	46.8016	0.199	0.213322	0.195	0.287	1.74	1.037	-0.652
Timor-Leste	TMP	0.227853	80.9	5.3	0	0	0	0	0	0	0.083	-1.026	-2.287	-1.425	-2.013	4.18394	0.480825	18	0	0.354198	0.693147	0.693147	0	0	0	0	0	0	0.511	0.1	0.125	0	5715.42	1629.16	41.9042	0.566	68.3106	69.056	70.058	0.453683	6.02006	42.2324	0.681	-0.814357	0.477	-0.038	0.178	0.091	0.794
Togo	TGO	-0.81834	85.1	6	0	0	0	0	0	0	1.246	-0.141	-2.748	-0.417	-1.473	2	0.471447	33	1	0.352735	0.646627	1.37699	0.44	0	0	0	0	0	0.5455	0.1155	0.4375	0.75	2602.69	2214.23	31.7341	0.547	61.0774	61.588	61.6566	0.42633	5.59031	21.365	0.423	-0.825225	0.455	-1.403	0.933	1.512	1.582
Tonga	TON	1.0307	55.8656	5.25638	0	0	0	0	0.124894	0.0502469	-1.00327	-3.23609	-3.46327	-1.14139	-2.64989	2.36594	0.487681	20.3778	-0.6789	0.693	0.693147	0.693147	0	0.118179	0.01287	0.131049	0	0	1	0.17129	0.110229	0.307365	6828	6360.18	28.7106	0.739	70.9668	71.27	73.7646	0.524577	10.8803	34.2654	0.430754	0.16195	0.0751429	3.19522	-0.0360554	1.55476	1.56132
Trinidad-Tobago	TTO	0.203907	52.9	3	0	0	0	0	0	0	-2.362	-2.002	-0.637	-2.094	-0.752	3.5	0.48679	29	1	0.719104	1.29103	0.693147	0.354	0	0	0	0	0	0.557	0	0.109375	0.5	29096.6	22473	3.07858	0.814	74.023	74.708	77.4974	0.602907	11.738	43.0246	0.766	0.119852	0.443	-1.418	-1.185	1.573	0.148
Tunisia	TUN	-0.738494	69.2	7.1	0	0	0	0	0	0	2.344	-0.347	0.882	1.758	2.029	5	0.471206	3	2	0.344148	0.693147	0.693147	0	0	0	0	0	0	0.4965	0.276	0.34375	0.5	12413.3	10296.6	14.3437	0.732	75.054	74.263	78.5068	0.51321	7.95339	38.9402	0.535	-0.147931	0.479	-1.756	0.182	-0.146	-0.361
Turkey	TUR	-1.20276	79.7	9.7	4	4	1	4	0	0	3.487	1.316	0.787	1.398	0.703	2	0.460233	0	6	0.796547	1.28269	0.818673	0.18	0	0	0	0	0	0.621	0.3145	0.456625	0.583333	30064.9	32833.5	17.5872	0.855	77.1504	78.475	80.2628	0.637286	8.81128	54.1206	0.288	-0.112986	0.38	1.336	1.641	-0.653	-1.364
Turkmenistan	TKM	-0.165017	68.2	5.6	0	0	0	0	0	0	-2.186	-2.602	-1.476	1.289	-2.173	2.68832	0.491464	29	0	0.676165	0.693147	0.777705	0	0	0	0	0	0	0.9755	0.15	0.175	0.361111	19805.7	12859.9	23.3882	0.744	69.0318	69.41	72.4438	0.532499	11.143	22.9996	0.15	-1.05027	0.025	2.087	2.65	0.663	-1.372
Tuvalu	TUV	1.24662	74.9157	4.7417	0	0	0	0	0.0267937	-0.242883	-0.649257	-3.31043	1.6231	-1.09557	-1.23294	4.1067	0.49177	85.9048	-7.57945	0.347	0.693147	0.693147	0	0.19469	0.0379605	0.232651	0	0	0.5	0.73343	-0.125842	0.29063	5023.89	4754.45	68.855	0.653	64.4546	64.854	69.0182	0.444051	10.6446	72.4746	0.660572	-0.447054	0.365635	-1.55069	-3.56574	0.859518	5.12219
Uganda	UGA	-0.79036	92.9	7.8	1	1	1	1	0	0	-0.395	-0.091	-1.318	0.35	-0.488	3	0.46455	0	2	0.676041	0.938946	0.693147	0.62	0	0	0	0	0	0.72	0.493	0.202168	0.75	2681.52	2240.59	67.8118	0.55	62.9798	63.638	65.051	0.383151	6.23548	55.2088	0.284	-0.628284	0.281	0.233	1.36	1.721	0.988
Ukraine	UKR	-1.51778	69.8	5.7	2	2	1	2	0	0	1.397	1.13	0.218	-0.247	0.303	4	0.466739	0	1	0.759174	1.73724	0.693147	0.16	0	0.148	0.148	0.5	0	0.437	0.739	0.354562	0.638889	17075	11416.2	15.2113	0.734	70.5662	68.564	75.6368	0.636883	11.1233	37.7302	0.533	-0.427767	0.566	-0.749	-0.808	1.909	1.214
United Arab Emirates	ARE	0.649465	40.3	2.8	0	0	0	0	0	0	-2.08	-3.207	-3.05	-2.044	-3.214	5	0.49119	49	0	0.691761	0.693147	0.693147	0	0	0	0	0	0	0.998	0.25	0.5625	0.416667	70055.4	74103.7	1.66107	0.937	79.241	79.196	81.4316	0.674507	12.7738	55.8618	0.099	1.35164	0	1.477	1.694	2.01	2.423
United Kingdom	GBR	0.416065	41.5	6.1	2.5	5	2	3	0	0	0.219	-1.167	1.627	-1.687	-0.094	4	0.471237	21	2	0.065801	2.12261	0.652453	0.136	0	0.136	0.136	1	1	0.031	0.5115	0.518655	0.666667	52832	46623.9	1.03719	0.94	81.1541	82.156	83.08	0.779963	13.4061	55.0768	0.864	1.32493	0.97	-1.386	-1.605	0.591	0.019
United States of America	USA	0.0852215	44.6	6.5	3	3	1	3	0	0	1.862	0.31	2.158	0.168	1.987	5	0.470981	0	1	0.0166472	1.28055	0.693147	0.332	0	0.013	0.013	0.5	0	0.013	0.75	0.90099	1	69608.4	65564.9	1.68355	0.927	77.6341	78.203	80.4	0.707724	13.5755	50.9274	0.825	1.36425	0.988	0.498	-0.98	0.977	2.604
Uruguay	URY	1.04966	35.9	2.4	0	0	0	0	0	0	-2.481	-3.324	-1.094	-2.241	-0.75	6	0.492575	47	1	0.025993	0.693147	0.693147	0	0	0	0	0	0	0.0375	0.169	0.546875	0.833333	29362.4	22207	8.2325	0.83	77.397	78	81.0866	0.600564	9.05822	49.8484	0.859	0.705646	0.964	-1.903	-1.952	1.686	2.456
Uzbekistan	UZB	-0.297407	72	6	3	3	1	3	0	0	-1.463	-2.675	-0.877	-0.868	-2.168	-0.263622	0.490621	15	2	2.45322	2.52	0.81093	0.075	0	0.025	0.025	1	1	0.9735	0.5	0.175	0.527778	7911.25	8055.91	26.4263	0.727	71.072	71.674	73.634	0.622806	11.9111	45.6778	0.205	-0.485778	0.027	0.348	0.553	1.62	1.112
Vanuatu	VUT	0.907394	63.0902	4.09908	0	0	0	0	0	0	-1.842	-1.63	-1.338	-1.664	-2.119	4.04423	0.48891	51.38	-0.244208	0.399946	0.693147	0.693147	0	0.33971	0.0698754	0.409586	0	0	0.577	0.141905	-0.0603653	0.161065	3167.76	3243.98	46.1566	0.614	70.1824	70.492	72.6288	0.449704	7.18321	59.882	0.769	-0.489717	0.421	-0.973	-1.191	1.347	0.611
Venezuela	VEN	-1.43059	92.6	7	3	3	1	3	0	0	1.696	1.602	0.127	-0.401	-0.094	5	0.464612	27	3	0.36057	1.5442	0.757096	0.152	0	0	0	0	0	0.2335	0.151	0.475	0.666667	27296.4	6184.14	11.0869	0.699	71.3788	71.105	75.9346	0.64429	9.62815	38.062	0.221	-1.76908	0.767	1.717	0.618	1.729	-0.889
Vietnam	VNM	-0.0231275	63.3	5.2	2	2	1	2	0	0	-0.689	-1.478	-0.141	-0.174	-1.293	4.5	0.481773	66	0	0.146492	2.00674	0.751627	0.106	0	0	0	0	0	0.073	0.55	0.163281	0.583333	12054.3	10814	33.5357	0.726	74.329	74.58	79.022	0.688602	8.45535	53.7704	0.17	0.125749	0.927	2.024	-0.702	1.839	0.814
Yemen	YEM	-2.69435	111.7	9.4	3	6	2	3	0	0	2.837	3.297	-0.187	1.932	-1.033	3	0.458206	0	6	0.674692	0.854582	1.12601	0.67	0	0	0	0	0	0.7895	0	0.08125	0.166667	-3952.2	1105.76	29.9254	0.424	64.358	63.72	67.8938	0.37271	2.77683	39.5626	0.117	-2.30442	0	1.417	1	-1.956	-1.135
Zambia	ZMB	-0.00216963	84.9	5.3	0	0	0	0	0	0	0.911	2.222	1.264	0.619	2.71	4.17	0.478221	56	0	0.378805	0.693147	0.693147	1	0	0	0	0	0	0.5465	0.134	0.307325	0.25	3569.02	3157.36	58.2729	0.569	62.1082	61.803	64.7612	0.394052	7.28489	39.9188	0.405	-0.743903	0.446	-0.275	0.793	1.77	2.63
Zimbabwe	ZWE	-0.911196	99.1	6.1	0	0	0	0	0	0	2.59	0.739	-0.747	0.884	-1.258	4	0.468959	40	2	0.832865	1.51983	0.740775	0.14	0	0	0	0	0	0.548	0.1	0.172656	0.416667	3381.82	2078.92	58.1641	0.55	60.4948	59.391	63.0512	0.464067	8.80776	55.7842	0.286	-1.30657	0.417	1.416	1.143	1.797	1.707
[truncated: 47 more columns]

## Sheet: Codebook
SOURCE	Final LABEL	Work LABEL	SPSS Label (Before Imputation)	EXPLANATION	MEASURE
ID	Country.Name	Country.Name	Country.Name	Name of the country	string
ID	CNTRY	CNTRY	CNTRY	3-digit abbreviation of the country name	string
WDI	WB.Pol.Stability.No.Violence	WB.Pol.Stability.No.Violence	WDI.WB.Pol.Stability.No.Violence
FFP	FSI_2021	FSI_2021	FFP.FSI_2021	Fragile States Index 2021	interval, range 1 to 120, lowest is the best
FFP	FSI_GG_2021	FSI_GG_2021	FFP.FSI_GG_2021	FSI_Group Grievance 2021	interval, range 1 to 10, lowest is the best
HIIK	HIIK.Comm.MJ_Min.Avrg.Intensity	HIIK. Comm.MJ_Min.Avrg.Intensity	HIIK. Comm.MJ_Min.Avrg.Intensity
HIIK	HIIK.Comm.MJ_Min.Idx	HIIK.Comm.MJ_Min.Idx	HIIK.Comm.MJ_Min.Idx
HIIK	HIIK.Comm.MJ_Min#	HIIK.Comm.MJ_Min#	HIIK.Comm.MJ_Min#
HIIK	HIIK.MX.intensity	HIIK.MX.intensity	HIIK.MX.intensity
V_Dem	Coups	e_pt_coup	V_Dem.e_pt_coup	Number of successful coup attempts in a year
V_Dem	Coup.Attempts	e_pt_coup_attempts	V_Dem.e_pt_coup_attempts	Number of coups attempts in a year
V_Dem	VD.Political.Polarization	v2cacamps	V_Dem.v2cacamps	Political polarization
V_Dem	VD.Political.Violence	v2caviol	V_Dem.v2caviol	Political violence
V_Dem	VD.Mass.Mobilization	v2cagenmob	V_Dem.v2cagenmob	Mass mobilization
V_Dem	VD.Mass.Mobilization.Autoc	v2caautmob	V_Dem.v2caautmob	Mobilization for autocracy
V_Dem	VD.Mass.Mobilization.Democr	v2cademmob	V_Dem.v2cademmob	Mobilization for democracy
ISD	ISD_ethnic_tensions_rating	ISD_ethnic_tensions_rating	ISD_ethnic_tensions_rating	ISD ethnic tensions rating
ISD	ISD_intergroup_cohesion	ISD_intergroup_cohesion	ISD_intergroup_cohesion	ISD intergroup cohesion	0 to 1, the highest is the most cohesive
EPR	peaceyears	peaceyears	EPR.peaceyears
EPR	warhist	warhist	EPR.warhist
QGIS	LN.Incongruence.IdxCentralization	LN.Incongruence.Idx*Centralization	QGIS.LN.Incongruence.Idx*Centralization
QGIS	LN.Incongruence.Idx	LN.Incongruence.Idx	QGIS.LN.Incongruence.Idx
QGIS	LN.Incongruence.MAJ	LN.Incongruence.MAJ	QGIS.LN.Incongruence.MAJ
QGIS	Reg.minorities.pc	Reg.majorities%	QGIS.Reg.majorities%
EPR	regautegippop	regautegippop	EPR.regautegippop
EPR	regautexclpop	regautexclpop	EPR.regautexclpop
EPR	regautpop	regautpop	EPR.regautpop
Calc	Territorial.autonomy	Territorial.autonomy	Calc.Territorial.autonomy	1 if all 3 sources claim it exists; 0.5 if only 1 or 2 claim
ERA	ERA_exists	ERA_exists	ERA_exists	Dummy for the existence of ERAs in the country	binary (0 or 1)
Calc	Polit.Centralization	Polit.Centralization	Calc.Polit.Centralization	V_dem.polit.decentr reversed
IS	IS_Admin_Dctr	IS_Admin_Dctr	IS_Admin_Dctr	Administrative decentralization	0 to 1, the highest is the most decentralized
IS	IS_Fiscal_Dctr	IS_Fiscal_Dctr	IS_Fiscal_Dctr	Fiscal decentralization	0 to 1, the highest is the most decentralized
IS	IS_Polit_Dctr	IS_Polit_Dctr	IS_Polit_Dctr	Political decentralization	0 to 1, the highest is the most decentralized
WDI	GDP_cap.PPP	GDP_cap.PPP	WDI.GDP_cap.PPP
HDR	Gross.national.income.GNI.per.capita	Gross.national.income.GNI.per.capita	HDR.Gross.national.income.GNI.per.capita	https://hdr.undp.org/data-center/human-development-index#/indicies/HDI
WDI	Empl.in.agriculture	Empl.in.agriculture	WDI.Empl.in.agriculture
HDR	Human.Development.Index	Human.Development.Index	HDR.Human.Development.Index	https://hdr.undp.org/data-center/human-development-index#/indicies/HDI
WDI	Life.Expectancy	Life.Expectancy	WDI.Life.Expectancy
HDR	Life.expectancy.at.birth	Life.expectancy.at.birth	HDR.Life.expectancy.at.birth	https://hdr.undp.org/data-center/human-development-index#/indicies/HDI
WDI	Life.Expectancy.Female	Life.Expectancy.Female	WDI.Life.Expectancy.Female
WDI	Human.capital.idxHCIscale01	Human.capital.idx (HCI) (scale 0-1)	WDI.Human.capital.idx (HCI) (scale 0-1)
HDR	Mean.years.of.schooling	Mean.years.of.schooling	HDR.Mean.years.of.schooling	https://hdr.undp.org/data-center/human-development-index#/indicies/HDI
WDI	Labor.f.particip.1524male	Labor.f.particip.15-24male	WDI.Labor.f.particip.15-24male
V_Dem	VD.Electoral.Demcrcy	v2x_polyarchy	V_Dem.v2x_polyarchy	Electoral democracy index	0_1 interval
WDI	WB.Gov.Effectiveness	WB.Gov.Effectiveness	WDI.WB.Gov.Effectiveness
V_Dem	VD.Federal.Unitary	v2x_feduni	V_Dem.v2x_feduni	Division of power index
V_Dem	VD.Ideology.Driven	v2exl_legitideol	V_Dem.v2exl_legitideol	Ideology (= the current regime promotes a specific ideology ~ a social/family/moral model, e.g. nationalism, socialism, etc)
V_Dem	VD.Ideol.Leader	v2exl_legitlead	V_Dem.v2exl_legitlead	Person of the Leader (~ exceptional qualities to lead)
V_Dem	VD.Ideol.Performance	v2exl_legitperf	V_Dem.v2exl_legitperf	Performance legitimation
V_Dem	VD.Ideol.Rational	v2exl_legitratio	V_Dem.v2exl_legitratio	Rational-legal legitimation
V_Dem	VD.Poli.Corrupt.Idx	v2x_corr	V_Dem.v2x_corr	Political corruption index
V_Dem	VD.Public.sector.corr	v2x_pubcorr	V_Dem.v2x_pubcorr	Public sector corruption index
V_Dem	VD.Regime.Corr	v2xnp_regcorr	V_Dem.v2xnp_regcorr	Regime corruption
V_Dem	VD.Executive.Corr	v2x_execorr	V_Dem.v2x_execorr	Executive corruption index
V_Dem	VD.Clientelism	v2xnp_client	V_Dem.v2xnp_client	Clientelism Index
V_Dem	VD.Neopatrimonialism	v2x_neopat	V_Dem.v2x_neopat	Neopatrimonial Rule Index
V_Dem	VD.Presidentialism	v2xnp_pres	V_Dem.v2xnp_pres	Presidentialism Index
V_Dem	VD.Freedom.from.State.Phys.Viol	v2x_clphy	V_Dem.v2x_clphy	Physical violence index
V_Dem	VD.Ethnic.Party.ban	v2psbantar_0	V_Dem.v2psbantar_0	Party ban target 0 - Ethnic parties	0_1 interval
V_Dem	VD.Relig.Party.ban	v2psbantar_1	V_Dem.v2psbantar_1	Party ban target 1 - Religious parties	0_1 interval
V_Dem	VD.Restrict.HOG	v2elrsthog	V_Dem.v2elrsthog	HOG restriction by ethnicity, race, religion, or language	binary
V_Dem	VD.Restrict.HOS	v2elrsthos	V_Dem.v2elrsthos	HOS restriction by ethnicity, race, religion, or language	binary
WDI	Population.ths	Population	WDI.Population
QOG	alesina_ethnic	alesina_ethnic	QOG.alesina_ethnic	Alesina Ethnic Fractionalization index, 2003
EPR	egippop	egippop	EPR.egippop	EGIP pop. as % of total pop.	%
EPR	exclpop	exclpop	EPR.exclpop	MEG pop. as % of total pop.	%
EPR	discrimpop	discrimpop	EPR.discrimpop
EPR	legippop	legippop	EPR.legippop
EPR	lpop	lpop	EPR.lpop	Ethnically relevant pop. (as % of total pop.)	%
FFP	FSI_UED_2021	FSI_UED_2021	FFP.FSI_UED_2021	FSI_Economic Inequality 2021	interval, range 1 to 10, lowest is the best
ISD	ISD_inclusion_of_minorities	ISD_inclusion_of_minorities	ISD_inclusion_of_minorities	ISD inclusion of minorities	0 to 1, the highest is the most inclusive
V_Dem	VD.Egalitarian.Component	v2x_egal	V_Dem.v2x_egal	Egalitarian component index	0_1 interval
V_Dem	VD.Power.by.Soc.GR	v2pepwrsoc	V_Dem.v2pepwrsoc	Power distributed by social group
V_Dem	VD.Equal.access	v2xeg_eqaccess	V_Dem.v2xeg_eqaccess	Equal access index	0_1 interval
V_Dem	VD.Equal.distrib.res.	v2xeg_eqdr	V_Dem.v2xeg_eqdr	Equal distribution of resources index	0_1 interval
V_Dem	VD.Equal.Protection	v2xeg_eqprotec	V_Dem.v2xeg_eqprotec	Equal protection index	0_1 interval
V_Dem	VD.Freedom.Religion	v2clrelig	V_Dem.v2clrelig	Freedom of religion
V_Dem	VD.Soc.Gr.Eq.C.Liberties	v2clsocgrp	V_Dem.v2clsocgrp	Social group equality in respect for civil liberties
V_Dem	VD.Repres.Disadv.Soc.Gr	v2lgdsadlo	V_Dem.v2lgdsadlo	Representation of disadvantaged social groups
V_Dem	VD.Excl.Soc.Gr	v2xpe_exlsocgr	V_Dem.v2xpe_exlsocgr	Exclusion by Social Group index
V_Dem	VD.Excl.SES	v2xpe_exlecon	V_Dem.v2xpe_exlecon	Exclusion by Socio-Economic Group
V_Dem	VD.Excl.Gender	v2xpe_exlgender	V_Dem.v2xpe_exlgender	Exclusion by Gender index
V_Dem	VD.Excl.Geo	v2xpe_exlgeo	V_Dem.v2xpe_exlgeo	Exclusion by Urban-Rural Location index
V_Dem	VD.Excl.Pol	v2xpe_exlpol	V_Dem.v2xpe_exlpol	Exclusion by Political Group index
V_Dem	VD.Legit.Ideol.Nation	v2exl_legitideolcr_0	V_Dem.v2exl_legitideolcr_0	Ideology character 0: Nationalist
V_Dem	VD.Legit.Ideol.Social	v2exl_legitideolcr_1	V_Dem.v2exl_legitideolcr_1	Ideology character 1: Socialist or communist
V_Dem	VD.Legit.Ideol.Cons	v2exl_legitideolcr_2	V_Dem.v2exl_legitideolcr_2	Ideology character 2: Restorative or conservative
V_Dem	VD.Legit.Ideol.Separ.Auton	v2exl_legitideolcr_3	V_Dem.v2exl_legitideolcr_3	Ideology character 3: Separatist or autonomist
V_Dem	VD.Legit.Ideol.Religious	v2exl_legitideolcr_4	V_Dem.v2exl_legitideolcr_4	Ideology character 4: Religious
V_Dem	VD.Educ.Nationalist	v2edpatriot	V_Dem.v2edpatriot	Patriotic education in the curriculum
V_Dem	VD.Educ.Pluralist	v2edplural	V_Dem.v2edplural	Pluralism in the curriculum
V_Dem	VD.Educ.Nation.Symbols.in.Sch	v2edscpatriot	V_Dem.v2edscpatriot	Presence of patriotic symbols in schools
V_Dem	VD.Celebr.Nation.Symbols	v2edscpatriotcb	V_Dem.v2edscpatriotcb	Celebration of patriotic symbols
V_Dem	VD.Media.Nationalist	v2medpatriot	V_Dem.v2medpatriot	Patriotism in the media
V_Dem	VD.Soc.Gr.Publ.Serv.	v2peapssoc	V_Dem.v2peapssoc	Access to public services distributed by social group
V_Dem	VD.Soc.Gr.State.Business	v2peasbsoc	V_Dem.v2peasbsoc	Access to state business opportunities by social group
V_Dem	VD.Soc.Gr.State.Jobs	v2peasjsoc	V_Dem.v2peasjsoc	Access to state jobs by social group
APPENDIX: The QGIS variables
QGIS	Total.nr.of.ADM01.divisions	Total.nr.of.ADM01.divisions	QGIS.Total.nr.of.ADM01.divisions
QGIS	Avrg.Population.in.ADM01	Avrg.Population.in.ADM01	QGIS.Avrg.Population.in.ADM01
QGIS	Avrg.Popul.%.in.ADM01	Avrg.Popul.%.in.ADM01	QGIS.Avrg.Popul.%.in.ADM01
QGIS	ADM01_with_regionals	ADM01_with_regionals	QGIS.ADM01_with_regionals
QGIS	ADM01_with_reg.majorities	ADM01_with_reg.majorities	QGIS.ADM01_with_reg.majorities
QGIS	ADM01_with_reg.minorities	ADM01_with_reg.minorities	QGIS.ADM01_with_reg.minorities
QGIS	Countries.with.Contain	Countries.with.Contain	QGIS.Countries.with.Contain
QGIS	Countries.with.Within	Countries.with.Within	QGIS.Countries.with.Within
QGIS	Avrge.Regional.groups.in.ADM01s	Avrge.Regional.groups.in.ADM01s	QGIS.Avrge.Regional.groups.in.ADM01s	Average of Count.regional.groups
QGIS	Regional.mins.exist	Regional.mins.exist	QGIS.Regional.mins.exist
QGIS	Avrge.Reg.Minorities.in.ADM01s	Avrge.Reg.Minorities.in.ADM01s	QGIS.Avrge.Reg.Minorities.in.ADM01s	Average of Count.minorities.only
QGIS	Regionals%	Regionals%	QGIS.Regionals%
QGIS	Reg.minorities%	Reg.minorities%	QGIS.Reg.minorities%
QGIS	Regionals sqkm	Regionals.sqkm	QGIS.Regionals.sqkm
QGIS	Reg.minorities sqkm	Reg.minorities.sqkm	QGIS.Reg.minorities.sqkm
QGIS	Reg.minorities.pc	Reg.minorities%All	QGIS.Reg.minorities%All
QGIS	Reg.Min.ADM01.per.Total.ADM01	Reg.Min.ADM01.per.Total.ADM01	QGIS.Reg.Min.ADM01.per.Total.ADM01
QGIS	Difference.Min	Difference.Min	QGIS.Difference.Min
QGIS	Incongruence.Idx	Incongruence.Idx	QGIS.Incongruence.Idx
QGIS	ADM01.MAJ.per.TotalADM01	ADM01.MAJ.per.TotalADM01	QGIS.ADM01.MAJ.per.TotalADM01
QGIS	Difference.MAJ	Difference.MAJ	QGIS.Difference.MAJ
QGIS	Incongruence.MAJ	Incongruence.MAJ	QGIS.Incongruence.MAJ
Calc	V_dem.polit.decentr	V_dem.polit.decentr	Calc.V_dem.polit.decentr	Average + 10 values imputed from IS Political Decentralization Idx

## Sheet: Appendix
Country.Name	CNTRY	Total.nr.of.ADM01.divisions	Avrg.Population.in.ADM01	Avrg.Popul.%.in.ADM01	ADM01_with_regionals	ADM01_with_reg.majorities	ADM01_with_reg.minorities	Countries.with.Contain	Countries.with.Within	Avrge.Regional.groups.in.ADM01s	Regional.mins.exist	Avrge.Reg.Minorities.in.ADM01s	Regionals%	Reg.minorities%	Regionals sqkm	Reg.minorities sqkm	Reg.minorities.pc	Reg.Min.ADM01.per.Total.ADM01	Difference.Min	Incongruence.Idx	ADM01.MAJ.per.TotalADM01	Difference.MAJ	Incongruence.MAJ	V_dem.polit.decentr
Afghanistan	AFG	34	1.14504e+06	0.0294118	34	34	33	1	0	2.85	1	1.91	0.872	0.462	555225	262048	0.462	0.970588	0.508588	1.10084	1	0.59	1.43902	0.0075
Albania	ALB	12	235796	0.0833333	3	0	3	0	0	1	1	1	0.1	0.1	2840	2840	0.1	0.25	0.15	1.5	0	0	0	0.6755
Algeria	DZA	48	904855	0.0208333	48	48	13	0	0	1.27	1	1	1	0.28	2041673	661547	0.28	0.270833	-0.00916667	-0.0327381	1	0.28	0.388889	0.09
Andorra	AND	7	11083.3	0.142857	0	0	0	0	0		0						0			0	0		0	1
Angola	AGO	18	1.8572e+06	0.0555556	18	9	17	1	0	1.78	1	1.35	0.88	0.62	910970	730286	0.62	0.944444	0.324444	0.523298	0.5	0.24	0.923077	0.016
Antigua &Barbuda	ATG	8	11584.7	0.125	0	0	0	0	0		0						0			0	0		0	0.5
Argentina	ARG	24	1.89045e+06	0.0416667	22	0	22	0	0	1	1	1	0.015	0.015	676975	676975	0.015	0.916667	0.901667	60.1111	0	0	0	0.937
Armenia	ARM	11	255167	0.0909091	11	11	4	0	1	1.45	1	1.25	0.9929	0.0139	25174	486	0.0139	0.363636	0.349736	25.1609	1	0.021	0.0214505	0.611
Australia	AUS	11	2.32086e+06	0.0909091	0	0	0	0	0		0						0			0	0		0	0.9735
Austria	AUT	9	991888	0.111111	1	0	1	0	0	1	1	1	0.003	0.003	1478	1478	0.003	0.111111	0.108111	36.037	0	0	0	0.981
Azerbaijan	AZE	10	1.00673e+06	0.1	10	10	7	0	0	1.7	1	1	0.966	0.046	77633	11605	0.046	0.7	0.654	14.2174	1	0.08	0.0869565	0.014
Bahamas	BHS	32	12692.6	0.03125	0	0	0	0	0		0						0			0	0		0	0.416667
Bahrain	BHR	4	369725	0.25	0	0	0	0	0		0						0			0	0		0	0.009
Bangladesh	BGD	8	2.09291e+07	0.125	8	8	1	0	0	1.13	1	1	0.905	0.01	137828	12705	0.01	0.125	0.115	11.5	1	0.105	0.117318	0.1415
Barbados	BRB	11	25516.3	0.0909091	0	0	0	0	0		0						0			0	0		0	0
Belarus	BLR	7	1.33626e+06	0.142857	4	0	4	0	0	1	1	1	0.031	0.031	12836	12836	0.031	0.571429	0.540429	17.4332	0	0	0	0.097
Belgium	BEL	3	3.84844e+06	0.333333	3	3	3	0	0	2.33	1	1.33	1	0.41	30700	16875	0.41	1	0.59	1.43902	1	0.41	0.694915	0.933
Belize	BLZ	6	65712.8	0.166667	6	0	6	0	0	2.17	1	2.17	0.433	0.433	10885	10885	0.433	1	0.567	1.30947	0	0	0	0.386667
Benin	BEN	12	1.05373e+06	0.0833333	12	9	11	0	0	1.83	1	1.18	0.815	0.485	94697	78415	0.485	0.916667	0.431667	0.890034	0.75	0.42	1.27273	0.4205
Bhutan	BTN	20	38620	0.05	20	12	15	0	0	1.45	1	1.13	0.8	0.6	33031	17186	0.6	0.75	0.15	0.25	0.6	0.4	2	0.8925
Bolivia	BOL	9	1.32498e+06	0.111111	8	0	8	0	0	1.88	1	1.88	0.59	0.59	596085	596085	0.59	0.888889	0.298889	0.506591	0	0	0	0.8865
Bosnia-Herzegovina	BIH	3	1.10558e+06	0.333333	3	3	3	0	0	3	1	2	0.963	0.462	52417	37000	0.462	1	0.538	1.1645	1	0.499	0.996008	0.876
Botswana	BWA	16	158953	0.0625	16	16	13	1	0	2.31	1	1.62	0.718	0.148	867984	326938	0.148	0.8125	0.6645	4.48986	1	0.43	0.754386	0.4845
Brazil	BRA	27	7.8873e+06	0.037037	17	0	17	0	0	1	1	1	0.004	0.004	3635961	3635961	0.004	0.62963	0.62563	156.407	0	0	0	0.97
Brunei	BRN	4	110421	0.25	3	1	3	0	1	1.67	1	1.33	0.71	0.14	1579	1348	0.14	0.75	0.61	4.35714	0.25	-0.32	-0.561404	0.666667
Bulgaria	BGR	28	244840	0.0357143	15	0	15	0	0	1	1	1	0.1	0.1	9990	9990	0.1	0.535714	0.435714	4.35714	0	0	0	0.5325
Burkina Faso	BFA	13	1.65602e+06	0.0769231	0	0	0	0	0		0						0			0	0		0	0.394
Burundi	BDI	17	717992	0.0588235	0	0	0	0	0		0						0			0	0		0	0.057
Cambodia	KHM	25	655894	0.04	25	25	23	0	0	2.52	1	1.65	0.992	0.042	206385	59403	0.042	0.92	0.878	20.9048	1	0.05	0.0526316	0.416
Cameroon	CMR	10	2.64927e+06	0.1	10	3	10	0	0	2.9	1	2.6	0.85	0.67	216808	165232	0.67	1	0.33	0.492537	0.3	0.12	0.666667	0.049
Canada	CAN	13	2.92152e+06	0.0769231	13	13	11	0	0	2.08	1	1.27	0.869	0.279	6324557	3973011	0.279	0.846154	0.567154	2.03281	1	0.41	0.694915	0.9755
Cape Verde	CPV	22	26472.2	0.0454545	0	0	0	0	0		0						0			0	0		0	0.46
Central African Republic	CAF	17	313923	0.0588235	13	0	13	0	0	1.31	1	1.31	0.51	0.51	96890	96890	0.51	0.764706	0.254706	0.499423	0	0	0	0.0045
Chad	TCD	23	724164	0.0434783	23	3	23	0	0	1.65	1	1.52	0.54	0.53	856914	778441	0.53	1	0.47	0.886792	0.130435	0.120435	12.0435	0.245
Chile	CHL	16	1.20173e+06	0.0625	11	0	11	0	0	1	1	1	0.128	0.128	142397	142397	0.128	0.6875	0.5595	4.37109	0	0	0	0.8175
China	CHN	33	4.27039e+07	0.030303	24	0	24	0	1	3.92	1	3.92	0.0834	0.0834	4529471	4529471	0.0834	0.727273	0.643873	7.7203	0	0	0	0.037
Colombia	COL	33	1.53809e+06	0.030303	33	32	27	1	0	1.94	1	1.19	1	0.29	1384806	826420	0.29	0.818182	0.528182	1.82132	0.969697	0.259697	0.36577	0.988
Comoros	COM	3	268791	0.333333	3	1	2	0	0	1	1	1	1	0.495	1700	652	0.495	0.666667	0.171667	0.346801	0.333333	-0.171667	-0.339934	0.8365
Congo DR (Zaire)	COD	26	3.57501e+06	0.0384615	25	0	25	0	0	2.72	1	2.72	0.719	0.719	1797483	1797483	0.719	0.961538	0.242538	0.337327	0	0	0	0.61
Congo Republic	COG	12	475337	0.0833333	12	5	10	0	0	1.83	1	1.7	0.63	0.54	92375	72571	0.54	0.833333	0.293333	0.54321	0.416667	0.326667	3.62963	0.804
Costa Rica	CRI	7	730947	0.142857	5	0	5	0	0	1.2	1	1.2	0.102	0.102	7699	7699	0.102	0.714286	0.612286	6.0028	0	0	0	0.484
Cote d'Ivoire	CIV	14	1.9156e+06	0.0714286	14	0	14	0	0	2.64	1	2.64	0.97	0.97	321291	321291	0.97	1	0.03	0.0309278	0	0	0	0.89
Croatia	HRV	21	189861	0.047619	14	0	14	0	0	1.21	1	1.21	0.0505	0.0505	7111	7111	0.0505	0.666667	0.616167	12.2013	0	0	0	0.9485
Cuba	CUB	16	705178	0.0625	0	0	0	0	0		0						0			0	0		0	0.2445
Cyprus	CYP	10	123618	0.1	10	8	6	0	0	1.4	1	1	0.98	0.18	8579	3043	0.18	0.6	0.42	2.33333	0.8	-1.19209e-08	-1.49012e-08	0.464
Czech Republic	CZE	14	759679	0.0714286	0	0	0	0	0		0						0			0	0		0	0.9465
Denmark	DNK	5	1.16797e+06	0.2	0	0	0	0	0		0						0			0	0		0	0.9735
Djibouti	DJI	6	181592	0.166667	6	4	4	0	0	1.33	1	1	0.91	0.36	21433	15884	0.36	0.666667	0.306667	0.851852	0.666667	0.116667	0.212121	0.3995
Dominica	DMA	10	7187.9	0.1	0	0	0	0	0		0						0			0	0		0	0.333333
Dominican Republic	DOM	32	343711	0.03125	0	0	0	0	0		0						0			0	0		0	0.675
Ecuador	ECU	24	731223	0.0416667	19	0	19	0	0	1.47	1	1.47	0.19	0.19	120394	120394	0.19	0.791667	0.601667	3.16667	0	0	0	0.963
Egypt	EGY	27	3.97835e+06	0.037037	24	24	5	0	0	1.21	1	1	1	0.09	79970	2178	0.09	0.185185	0.0951852	1.05761	0.888889	-0.0211111	-0.0231991	0.064
El Salvador	SLV	14	449998	0.0714286	12	0	12	0	0	1	1	1	0.1	0.1	9832	9832	0.1	0.857143	0.757143	7.57143	0	0	0	0.657
Equatorial Guinea	GNQ	7	227444	0.142857	7	6	4	0	0	1.71	1	1.5	0.972	0.115	28103	4376	0.115	0.571429	0.456429	3.96894	0.857143	0.000142864	0.000166702	0.0215
Eritrea	ERI	6	593480	0.166667	6	5	5	0	0	2.33	1	1.8	0.98	0.5	120591	103167	0.5	0.833333	0.333333	0.666667	0.833333	0.353333	0.736111	0.0035
Estonia	EST	16	83227.1	0.0625	0	0	0	0	0		0						0			0	0		0	0.4895
Eswatini	SWZ	4	295232	0.25	0	0	0	0	0		0						0			0	0		0	0.3705
Ethiopia	ETH	11	1.06564e+07	0.0909091	11	10	11	0	0	3.36	1	2.45	0.9273	0.5834	1103032	773943	0.5834	1	0.4166	0.71409	0.909091	0.565191	1.64347	0.372
Fiji	FJI	5	184490	0.2	0	0	0	0	0		0						0			0	0		0	0.2845
Finland	FIN	8	691595	0.125	7	5	4	0	0	1.29	1	1	0.99	0.06	330114	7917	0.06	0.5	0.44	7.33333	0.625	-0.305	-0.327957	0.7245
France	FRA	13	5.19774e+06	0.0769231	13	12	2	0	0	1.08	1	1	0.984	0.008	523541	11353	0.008	0.153846	0.145846	18.2308	0.923077	-0.0529231	-0.0542245	0.977
Gabon	GAB	9	254612	0.111111	9	3	8	0	0	1.56	1	1.38	0.84	0.64	176462	133785	0.64	0.888889	0.248889	0.388889	0.333333	0.133333	0.666667	0.6835
Gambia	GMB	6	429123	0.166667	6	0	6	0	0	2.5	1	2.5	0.835	0.835	9036	9036	0.835	1	0.165	0.197605	0	0	0	0.6195
Georgia	GEO	12	309842	0.0833333	12	12	9	0	0	2.5	1	2	0.973	0.156	69727	17637	0.156	0.75	0.594	3.80769	1	0.183	0.22399	0.4725
Germany	DEU	16	5.20192e+06	0.0625	0	0	0	0	0		0						0			0	0		0	0.991
Ghana	GHA	16	2.01103e+06	0.0625	16	0	16	1	0	2.19	1	2.19	0.94	0.94	258447	258447	0.94	1	0.06	0.0638298	0	0	0	0.198
Greece	GRC	8	1.32873e+06	0.125	2	0	2	0	0	1.5	1	1.5	0.023	0.023	9917	9917	0.023	0.25	0.227	9.86957	0	0	0	0.9215
Grenada	GRD	7	17664.9	0.142857	0	0	0	0	0		0						0			0	0		0	0
Guatemala	GTM	22	766154	0.0454545	21	0	21	1	1	1.05	1	1.05	0.52	0.52	52494	52494	0.52	0.954545	0.434545	0.835664	0	0	0	0.605
Guinea	GIN	8	1.65072e+06	0.125	8	7	7	0	0	2.5	1	1.86	0.9	0.6	223682	104174	0.6	0.875	0.275	0.458333	0.875	0.575	1.91667	0.3945
Guinea-Bissau	GNB	9	223945	0.111111	8	0	8	0	0	1.88	1	1.88	0.51	0.51	17278	17278	0.51	0.888889	0.378889	0.742919	0	0	0	0.169
Guyana	GUY	10	79895.2	0.1	10	5	10	0	0	2.3	1	1.8	0.795	0.397	91380	87696	0.397	1	0.603	1.51889	0.5	0.102	0.256281	0.7945
Haiti	HTI	10	1.13024e+06	0.1	0	0	0	0	0		0						0			0	0		0	0.6225
Honduras	HND	18	562052	0.0555556	10	0	10	0	0	1.2	1	1.2	0.087	0.087	12088	12088	0.087	0.555556	0.468556	5.3857	0	0	0	0.5585
Hong Kong	HKG							0	0		0						0			0			0	0
Hungary	HUN	20	486498	0.05	10	0	10	0	0	1	1	1	0.01	0.01	4722	4722	0.01	0.5	0.49	49	0	0	0	0.8605
Iceland	ISL	8	45856.8	0.125	0	0	0	0	0		0						0			0	0		0	0.4975
India	IND	36	3.87402e+07	0.0277778	35	14	35	1	0	3.74	1	3.34	0.7175	0.4545	4921776	4232043	0.4545	0.972222	0.517722	1.1391	0.388889	0.125889	0.478665	0.931
Indonesia	IDN	34	7.98684e+06	0.0294118	32	10	31	0	0	2.22	1	1.97	0.7874	0.3374	1321110	1215662	0.3374	0.911765	0.574365	1.70233	0.294118	-0.155882	-0.346405	0.931
Iran	IRN	31	2.81255e+06	0.0322581	30	25	25	0	0	2.53	1	2.04	0.9	0.39	1502287	644003	0.39	0.806452	0.416452	1.06782	0.806452	0.296452	0.581278	0.0375
Iraq	IRQ	18	2.36379e+06	0.0555556	18	13	13	1	0	2.28	1	2.15	0.981	0.356	281322	173172	0.356	0.722222	0.366222	1.02871	0.722222	0.0972222	0.155556	0.689
Ireland	IRL	26	191903	0.0384615	0	0	0	0	0		0						0			0	0		0	0.3775
Israel	ISR	9	1.02402e+06	0.111111	7	0	7	0	0	1.86	1	1.86	0.43	0.43	8687	8687	0.43	0.777778	0.347778	0.808786	0	0	0	0.4965
Italy	ITA	20	2.97663e+06	0.05	6	0	6	0	0	1.17	1	1.17	0.038	0.038	41455	41455	0.038	0.3	0.262	6.89474	0	0	0	0.9795
Jamaica	JAM	14	201445	0.0714286	0	0	0	0	0		0						0			0	0		0	0.4895
Japan	JPN	47	2.68303e+06	0.0212766	2	0	2	0	0	1	1	1	0.0102	0.0102	2495	2495	0.0102	0.0425532	0.0323532	3.17188	0	0	0	0.9905
Jordan	JOR	12	908690	0.0833333	12	0	12	1	0	1	1	1	0.5	0.5	21173	21173	0.5	1	0.5	1	0	0	0	0.1305
Kazakhstan	KAZ	14	1.34817e+06	0.0714286	14	14	10	0	0	1.71	1	1	0.888	0.208	3070550	671502	0.208	0.714286	0.506286	2.43407	1	0.32	0.470588	0.056
Kenya	KEN	47	1.10606e+06	0.0212766	47	0	47	1	0	1.7	1	1.7	0.95	0.95	370828	370828	0.95	1	0.05	0.0526316	0	0	0	0.8525
Kiribati	KIR							0	0		0						0			0			0	1
Korea, North	PRK	14	1.84718e+06	0.0714286	0	0	0	0	0		0						0			0	0		0	0.278
Korea, South	KOR	17	3.04269e+06	0.0588235	0	0	0	0	0		0						0			0	0		0	0.9725
Kosovo	XKX	7	255149	0.142857	7	7	6	0	0	2.57	1	1.83	0.9748	0.1088	12434	2658	0.1088	0.857143	0.748343	6.87815	1	0.134	0.154734	0.4585
Kuwait	KWT	6	721257	0.166667	6	6	6	1	0	2	1	1	0.34	0.11	33502	16751	0.11	1	0.89	8.09091	1	0.77	3.34783	0
Kyrgyzstan	KGZ	9	735716	0.111111	9	8	8	0	0	2.22	1	1.5	0.912	0.263	105178	11136	0.263	0.888889	0.625889	2.37981	0.888889	0.239889	0.369629	0.2945
Laos	LAO	18	406567	0.0555556	18	14	18	0	0	2.44	1	1.67	0.92	0.37	138186	96649	0.37	1	0.63	1.7027	0.777778	0.227778	0.414141	0.5665
Latvia	LVA	5	380213	0.2	1	0	1	0	0	1	1	1	0.039	0.039	825	825	0.039	0.2	0.161	4.12821	0	0	0	0.493
Lebanon	LBN	8	711951	0.125	8	0	8	0	0	6.13	1	6.13	0.93	0.93	12004	12004	0.93	1	0.07	0.0752688	0	0	0	0.416
Lesotho	LSO	10	225302	0.1	0	0	0	0	0		0						0			0	0		0	0.694
Liberia	LBR	15	339445	0.0666667	12	0	12	0	0	1.67	1	1.67	0.237	0.237	49059	49059	0.237	0.8	0.563	2.37553	0	0	0	0.4075
Libya	LBY	22	302259	0.0454545	22	21	9	0	0	1.41	1	1.11	1	0.156	995955	341294	0.156	0.409091	0.253091	1.62238	0.954545	0.110545	0.130978	0.381
Liechtenstein	LIE	11	3523.36	0.0909091	0	0	0	0	0		0						0			0	0		0	1
Lithuania	LTU	10	280461	0.1	10	10	4	0	0	1.4	1	1	0.908	0.066	67606	7801	0.066	0.4	0.334	5.06061	1	0.158	0.187648	0.492
Luxembourg	LUX	3	210102	0.333333	0	0	0	0	0		0						0			0	0		0	0.418
Madagascar	MDG	6	4.70441e+06	0.166667	0	0	0	0	0		0						0			0	0		0	0.374
Malawi	MWI	28	692195	0.0357143	28	0	28	1	0	1.46	1	1.46	1	1	120477	120477	1	1	-1.49012e-08	-1.49012e-08	0	0	0	0.4885
Malaysia	MYS	16	2.07394e+06	0.0625	15	11	15	1	0	3.07	1	2.33	0.846	0.346	413690	301720	0.346	0.9375	0.5915	1.70954	0.6875	0.1875	0.375	0.595
Maldives	MDV							0	0		0						0			0			0	0.4535
Mali	MLI	9	2.36054e+06	0.111111	9	8	6	1	0	2	1	1.67	1	0.1	1032103	561608	0.1	0.666667	0.566667	5.66667	0.888889	-0.0111111	-0.0123457	0.405
Malta	MLT	5	102147	0.2	0	0	0	0	0		0						0			0	0		0	0.4335
Marshall Islands	MHL	23	1893.47	0.0434783	0	0	0	0	0		0						0			0	0		0	0.5
Mauritania	MRT	13	346220	0.0769231	13	13	13	0	0	2.31	1	1.31	1	0.7	1822672	919973	0.7	1	0.3	0.428571	1	0.7	2.33333	0.416
Mauritius	MUS	12	105441	0.0833333				0	0		0		0.27	0.27	0	0	0			0	0.0833333	0.0833333	0	0.4665
Mexico	MEX	32	3.93317e+06	0.03125	22	0	22	0	0	1.32	1	1.32	0.199	0.199	458234	458234	0.199	0.6875	0.4885	2.45477	0	0	0	0.987
Micronesia	FSM	4	28085.5	0.25	0	0	0	0	0		0						0			0	0		0	1
Moldova	MDA	37	71033.8	0.027027	37	37	32	0	0	2.08	1	1.25	0.923	0.172	36815	6464	0.172	0.864865	0.692865	4.02828	1	0.249	0.331558	0.463
Monaco	MCO							0	0		0						0			0			0	1
Mongolia	MNG	22	149426	0.0454545	1	0	1	0	0	1	1	1	0.04	0.04	15093	15093	0.04	0.0454545	0.00545455	0.136364	0	0	0	0.521
Montenegro	MNE	21	29542.7	0.047619	21	21	21	0	0	2.67	1	1.67	0.915	0.465	21312	8854	0.465	1	0.535	1.15054	1	0.55	1.22222	0.4105
Morocco	MAR	15	2.44607e+06	0.0666667	19	19	17	0	0	2.11	1	1.24	1	0.408	834649	394376	0.408	1.13333	0.725333	1.77778	1.26667	0.674667	1.13964	0.3105
Mozambique	MOZ	11	2.83517e+06	0.0909091	8	0	8	0	0	1.38	1	1.38	0.452	0.452	268234	268234	0.452	0.727273	0.275273	0.60901	0	0	0	0.624
Myanmar	MMR	15	3.56142e+06	0.0666667	15	14	14	0	0	3.53	1	2.79	0.9535	0.2735	678766	388881	0.2735	0.933333	0.659833	2.41255	0.933333	0.253333	0.372549	0.525
Namibia	NAM	13	191363	0.0769231	13	7	12	0	0	4.38	1	4.17	0.931	0.433	1212851	1134394	0.433	0.923077	0.490077	1.13182	0.538462	0.0404615	0.0812481	0.8255
Nauru	NRU	14	879.286	0.0714286	0	0	0	0	0		0						0			0	0		0	0
Nepal	NPL	5	5.89082e+06	0.2	5	5	5	0	0	3.4	1	2.4	0.53	0.22	102746	27787	0.22	1	0.78	3.54545	1	0.69	2.22581	0.9355
Netherlands	NLD	14	1.24646e+06	0.0714286	0	0	0	0	0		0						0			0	0		0	0.911
New Zealand	NZL	19	265247	0.0526316	0	0	0	0	0		0						0			0	0		0	0.486
Nicaragua	NIC	18	375455	0.0555556	18	18	3	0	0	1.33	1	2	0.987	0.127	129034	19679	0.127	0.166667	0.0396667	0.312336	1	0.14	0.162791	0.3345
Niger	NER	8	3.04537e+06	0.125	8	4	8	1	0	2.5	1	2	0.91	0.35	1024581	978674	0.35	1	0.65	1.85714	0.5	-0.06	-0.107143	0.727
Nigeria	NGA	37	5.63223e+06	0.027027	37	0	37	1	0	1.65	1	1.65	0.81	0.81	616386	616386	0.81	1	0.19	0.234568	0	0	0	0.9755
North Macedonia	MKD	81	22938.9	0.0123457	81	76	49	0	0	1.56	1	1.02	0.927	0.286	26001	4048	0.286	0.604938	0.318938	1.11517	0.938272	0.297272	0.463762	0.495
Norway	NOR	19	283208	0.0526316	0	0	0	0	0		0						0			0	0		0	0.949
Oman	OMN	11	415347	0.0909091	0	0	0	0	0		0						0			0	0		0	0.407
Pakistan	PAK	8	2.84362e+07	0.125	8	5	6	0	0	2.25	1	2.17	0.896	0.336	863221	643225	0.336	0.75	0.414	1.23214	0.625	0.065	0.116071	0.6145
Palau	PLW	16	1122.89	0.0625	0	0	0	0	0		0						0			0	0		0	1
Panama	PAN	13	330031	0.0769231	10	0	10	0	0	1.7	1	1.7	0.285	0.285	14661	14661	0.285	0.769231	0.484231	1.69906	0	0	0	0.653
Papua New Guinea	PNG	22	442849	0.0454545	22	21	1	0	0	1	1	1	1	0.034	461688	9456	0.034	0.0454545	0.0114545	0.336898	0.954545	-0.0114546	-0.0118577	0.885
Paraguay	PRY	18	367518	0.0555556	14	0	14	0	0	1	1	1	0.02	0.02	189116	189116	0.02	0.777778	0.757778	37.8889	0	0	0	0.9665
Peru	PER	26	1.27768e+06	0.0384615	26	22	25	0	0	2.73	1	1.96	0.952	0.291	1122779	766158	0.291	0.961538	0.670538	2.30426	0.846154	0.185154	0.280112	0.9595
Philippines	PHL	81	1.38415e+06	0.0123457	80	76	57	1	0	1.84	1	1.25	0.985	0.126	314161	127337	0.126	0.703704	0.577704	4.58495	0.938272	0.0792716	0.0922836	0.9785
Poland	POL	16	2.3551e+06	0.0625	3	0	3	0	0	1	1	1	0.014	0.014	6258	6258	0.014	0.1875	0.1735	12.3929	0	0	0	0.913
Portugal	PRT	20	516387	0.05	0	0	0	0	0		0						0			0	0		0	0.4815
Qatar	QAT	7	391935	0.142857	0	0	0	0	0		0						0			0	0		0	0
Romania	ROM	42	458476	0.0238095	42	42	25	0	0	1.88	1	1.48	0.898	0.063	268341	36923	0.063	0.595238	0.532238	8.44822	1	0.165	0.197605	0.811
Russia	RUS	83	1.74718e+06	0.0120482	83	83	60	0	0	3.29	1	3.17	0.9382	0.1312	11874478	4436858	0.1312	0.722892	0.591692	4.50984	1	0.193	0.239157	0.644
Rwanda	RWA	5	2.63007e+06	0.2	0	0	0	0	0		0						0			0	0		0	0.486
Samoa	WSM	11	19594.2	0.0909091	0	0	0	0	0		0						0			0	0		0	0
San Marino	SMR	9	3772.13	0.111111	0	0	0	0	0		0						0			0	0		0	1
Sao Tome & Principe	STP	2	109507	0.5	0	0	0	0	0		0						0			0	0		0	0.9555
Saudi Arabia	SAU	13	2.75695e+06	0.0769231	13	7	10	1	0	1.46	1	1.2	0.79	0.43	692066	368274	0.43	0.769231	0.339231	0.788909	0.538462	0.178462	0.495726	0.007
Senegal	SEN	14	1.17436e+06	0.0714286	14	0	14	0	0	2.57	1	2.57	0.95	0.95	215059	215059	0.95	1	0.05	0.0526316	0	0	0	0.4855
Serbia	SRB	25	274606	0.04	17	0	17	0	0	1.12	1	1.12	0.071	0.071	12026	12026	0.071	0.68	0.609	8.57746	0	0	0	0.463
Seychelles	SYC	26	3938.35	0.0384615	0	0	0	0	0		0						0			0	0		0	0.007
Sierra Leone	SLE	4	2.05842e+06	0.25	4	0	4	0	0	2.75	1	2.75	0.72	0.72	57075	57075	0.72	1	0.28	0.388889	0	0	0	0.467
Singapore	SGP	5	1.12475e+06	0.2	0	0	0	0	0		0						0			0	0		0	0
Slovakia	SVK	8	680969	0.125	5	0	5	0	0	1	1	1	0.101	0.101	9739	9739	0.101	0.625	0.524	5.18812	0	0	0	0.9905
Slovenia	SVN	12	174746	0.0833333	1	0	1	0	0	1	1	1	0.0011	0.0011	306	306	0.0011	0.0833333	0.0822333	74.7576	0	0	0	0.4845
Solomon Islands	SLB	10	69151.1	0.1	0	0	0	0	0		0						0			0	0		0	0.4615
Somalia	SOM	18	917694	0.0555556	0	0	0	0	0		0						0			0	0		0	0.1005
South Africa	ZAF	9	6.52255e+06	0.111111	9	0	9	0	0	6.67	1	6.67	0.9652	0.9652	1721946	1721946	0.9652	1	0.0348	0.0360547	0	0	0	0.917
South Sudan	SSD	10	1.06221e+06	0.1	9	8	8	0	0	4	1	3.5	0.92	0.52	398945	261645	0.52	0.8	0.28	0.538462	0.8	0.4	1	0.091
Spain	ESP	18	2.62769e+06	0.0555556	17	16	9	0	0	1.53	1	1.11	0.963	0.283	523066	94205	0.283	0.5	0.217	0.766784	0.888889	0.208889	0.30719	0.9925
Sri Lanka	LKA	25	877832	0.04	25	23	25	1	0	3.12	1	2.2	0.99	0.24	99602	41930	0.24	1	0.76	3.16667	0.92	0.17	0.226667	0.877
St Kitts &Nevis	KNA	14	3405.4	0.0714286	0	0	0	0	0		0						0			0	0		0	0.5
St Vincent &Grenadines	VCT	6	17437.2	0.166667	0	0	0	0	0		0						0			0	0		0	0.166667
St. Lucia	LCA	10	17904.3	0.1	0	0	0	0	0		0						0			0	0		0	0.583333
Sudan	SDN	18	2.46892e+06	0.0555556	18	9	18	0	0	2.78	1	2.28	0.943	0.753	928366	817247	0.753	1	0.247	0.328021	0.5	0.31	1.63158	0.159
Suriname	SUR	10	60642.1	0.1	10	0	10	0	0	3.5	1	3.5	0.9564	0.9564	62168	62168	0.9564	1	0.0436	0.0455876	0	0	0	0.4595
Sweden	SWE	21	492479	0.047619	0	0	0	0	0		0						0			0	0		0	0.948
Switzerland	CHE	26	332370	0.0384615	26	23	12	0	0	1.38	1	1.08	0.938	0.308	38024	14238	0.308	0.462	0.154	0.5	0.884615	0.254615	0.404151	0.9955
Syria	SYR	14	1.48077e+06	0.0714286	14	6	14	1	0	2.57	1	2.14	0.99	0.86	181664	174015	0.86	1	0.14	0.162791	0.428571	0.298571	2.2967	0.0495
Taiwan	TWN	7	3.28571e+06	0.142857	6	6	4	0	0	1.67	1	1	0.86	0.02	35989	18741	0.02	0.571429	0.551429	27.5714	0.857143	0.0171429	0.0204082	0.4795
Tajikistan	TJK	5	1.90845e+06	0.2	5	5	5	0	0	2.4	1	1.4	0.973	0.152	92905	22996	0.152	1	0.848	5.57895	1	0.179	0.218027	0.015
Tanzania	TZA	31	1.99196e+06	0.0322581	31	29	31	1	0	2.29	1	1.35	1	0.397	1819575	942255	0.397	1	0.603	1.51889	0.935484	0.332484	0.551383	0.4955
Thailand	THA	77	927817	0.012987	77	75	25	0	0	1.31	1	1.04	0.88	0.065	517306	62776	0.065	0.324675	0.259675	3.995	0.974026	0.159026	0.195124	0.194
Timor-Leste	TMP	13	100069	0.0769231	0	0	0	0	0		0						0			0	0		0	0.489
Togo	TGO	5	1.68904e+06	0.2	5	4	2	0	0	1.2	1	1	0.71	0.44	26837	14109	0.44	0.4	-0.04	-0.0909091	0.8	0.53	1.96296	0.4545
Tonga	TON	5	21129.2	0.2	0	0	0	0	0		0						0			0	0		0	0
Trinidad-Tobago	TTO	15	101327	0.0666667	14	0	14	1	0	1	1	1	0.354	0.354	4699	4699	0.354	0.933333	0.579333	1.63653	0	0	0	0.443
Tunisia	TUN	24	506360	0.0416667	0	0	0	0	0		0						0			0	0		0	0.5035
Turkey	TUR	81	1.02839e+06	0.0123457	81	77	38	1	0	1.42	1	1	0.93	0.18	804640	177241	0.18	0.469136	0.289136	1.60631	0.950617	0.200617	0.26749	0.379
Turkmenistan	TKM	6	1.04155e+06	0.166667	6	6	0	0	0	1	0		0.85		466782		0			0	1	0.15	0.176471	0.0245
Tuvalu	TUV	9	1231.24	0.111111	0	0	0	0	0		0						0			0	0		0	0.5
Uganda	UGA	58	765422	0.0172414	56	0	56	0	0	1.86	1	1.86	0.62	0.62	172120	172120	0.62	0.965517	0.345517	0.557286	0	0	0	0.28
Ukraine	UKR	28	1.5373e+06	0.0357143	21	0	21	1	0	1.19	1	1.19	0.1602	0.1602	43568	43568	0.1602	0.75	0.5898	3.68165	0	0	0	0.563
United Arab Emirates	ARE	7	1.32701e+06	0.142857	0	0	0	0	0		0						0			0	0		0	0.002
United Kingdom	GBR	4	1.67598e+07	0.25	4	3	4	0	0	2.25	1	1.5	0.951	0.136	241506	101304	0.136	1	0.864	6.35294	0.75	-0.065	-0.0797546	0.969
United States of America	USA	51	6.47849e+06	0.0196078	44	0	44	0	0	1.66	1	1.66	0.332	0.332	3859612	3859612	0.332	0.862745	0.530745	1.59863	0	0	0	0.987
Uruguay	URY	19	180354	0.0526316	0	0	0	0	0		0						0			0	0		0	0.9625
Uzbekistan	UZB	14	2.4476e+06	0.0714286	14	14	12	0	0	1.86	1	1	0.875	0.075	159095	19406	0.075	0.857143	0.782143	10.4286	1	0.2	0.25	0.0265
Vanuatu	VUT	6	51975.5	0.166667	0	0	0	0	0		0						0			0	0		0	0.423
Venezuela	VEN	25	1.15031e+06	0.04	25	24	14	0	0	1.6	1	1.14	1	0.152	955893	475334	0.152	0.56	0.408	2.68421	0.96	0.112	0.132075	0.7665
Vietnam	VNM	63	1.53332e+06	0.015873	62	60	43	0	0	2.44	1	2.12	0.956	0.106	272941	148116	0.106	0.68254	0.57654	5.43905	0.952381	0.102381	0.120448	0.927
Yemen	YEM	21	1.53619e+06	0.047619	21	14	19	0	0	1.81	1	1.26	0.99	0.67	194459	132355	0.67	0.904762	0.234762	0.350391	0.666667	0.346667	1.08333	0.2105
Zambia	ZMB	10	1.8927e+06	0.1	10	0	10	0	0	2.3	1	2.3	1	1	622773	622773	1	1	-1.30385e-08	-1.30385e-08	0	0	0	0.4535
Zimbabwe	ZWE	10	1.56781e+06	0.1	10	9	5	1	0	1.4	1	1	0.96	0.14	303528	101698	0.14	0.5	0.36	2.57143	0.9	0.08	0.097561	0.452
